# Supplementary material for: Multicomponent synthesis of pyrido[2,3-b]pyrazine derivatives: electrochemical DNA sensing, nonlinear optical properties and biological activity
Source: Royal Society of Chemistry journal article supplement (doi:10.1039/d3ra05365b), 2023-01-01
Supplement: d3ra05365b1.pdf [file d3ra05365b1.pdf]

### Supplementary information

#### **Multicomponent Synthesis of Pyrido[2,3-*b*]pyrazine Derivatives: Electrochemical DNA Sensing, Nonlinear Optical Properties and Biological Activity**

Muhammad Rashid<sup>a</sup>, Muhammad Khalid<sup>b,c</sup>, Abida Ashraf<sup>a,d</sup>, Tahira Saleem<sup>a</sup>, Iqra Shafiq<sup>b,c</sup>  
Muhammad Azeem Shakil<sup>a</sup>, Briha Zainab<sup>a</sup>, Attalla F. El-kott<sup>e,f</sup>, Muhammad Yaqub<sup>a</sup> and Zahid Shafiq<sup>a</sup>

<sup>a</sup>Institute of Chemical Sciences, Bahauddin Zakariya University, Multan 60800, Pakistan

<sup>b</sup>Institute of Chemistry, Khwaja Fareed University of Engineering & Information Technology, Rahim Yar Khan, 64200, Pakistan

<sup>c</sup>Centre for Theoretical and Computational Research, Khwaja Fareed University of Engineering & Information Technology, Rahim Yar Khan, 64200, Pakistan

<sup>d</sup>Department of Chemistry, Govt. Graduate College Shah Rukne- Alam Multan

<sup>e</sup>Department of Biology, College of Science, King Khalid University, Abha, Saudi Arabia.

<sup>f</sup>Department of Zoology, College of Science, Damanhour University, Egypt

#### **Corresponding Authors**

Dr. Muhammad Yaqub ([mayaqub2@yahoo.com](mailto:mayaqub2@yahoo.com))

Dr. Zahid Shafiq ([zahidshafiq@bzu.edu.pk](mailto:zahidshafiq@bzu.edu.pk), Tel. +92-3006559811)

## Table of contents

|                                                                                                                                                                                                                                |               |
|--------------------------------------------------------------------------------------------------------------------------------------------------------------------------------------------------------------------------------|---------------|
| 1- Optimization of reaction conditions for the synthesis of compound 7                                                                                                                                                         | Table S1      |
| 2- Synthesized 2-aminopyrazine derived fused ring heterocyclic compounds (4-7)                                                                                                                                                 | Table S2      |
| 3- General mechanism for synthesis of (4-7)                                                                                                                                                                                    | Scheme S1     |
| 4- NBO table of compound (4-7)                                                                                                                                                                                                 | Table S3      |
| 5- HOMO-1, LUMO+1, HOMO-2 and LUMO+2 of the studied compounds 4-7                                                                                                                                                              | Figure S1     |
| 6- Computed energies ( $E$ ) and energy gap ( $E_{\text{LUMO}}-E_{\text{HOMO}}$ ) of HOMO and LUMO of investigated compounds                                                                                                   | Table S7      |
| 7- Calculated energies ( $E$ ) and energy gap ( $\Delta E$ ) of HOMO-1, LUMO+1, HOMO-2 and LUMO+2 for <b>D4-D7</b> .                                                                                                           | Table S8      |
| 8- Global reactivity parameters of (4-7) compounds.                                                                                                                                                                            | Table S9      |
| 9- DOS graphs of 4-7 compounds                                                                                                                                                                                                 | Figure S2     |
| 10- DOS %age of HOMO and LUMO for 4-7 compounds                                                                                                                                                                                | Table S10     |
| 11- Absorption spectra of compounds 4-7 in gaseous phase                                                                                                                                                                       | Figure S3     |
| 12- UV-Visible analysis of compound 4-7                                                                                                                                                                                        | Table S11-S14 |
| 13- Calculated vibrational frequencies of 4-7                                                                                                                                                                                  | Table S16-S19 |
| 14- NPA graphs of 4-7 compounds                                                                                                                                                                                                | Figure S4     |
| 15- Computed average polarizability $\langle\alpha\rangle$ dipole moment ( $\mu_{\text{tot}}$ ), first hyperpolarizability ( $\beta_{\text{tot}}$ ) and second hyperpolarizability ( $\gamma_{\text{tot}}$ ) of compounds 4-7. | Table S20     |
| 16- Dipole polarizability and major contributing tensor ( <i>e.s.u.</i> ) of the studied comp. 4-7.                                                                                                                            | Table S21     |
| 17- Frequency dependent Second hyperpolarizability ( <i>e.s.u.</i> ) of studied compounds 4-7                                                                                                                                  | Table S22     |
| 18- The computed first hyperpolarizability ( $\beta_{\text{tot}}$ ) and major contributing tensors ( <i>e.s.u.</i> ) of compounds 4-7.                                                                                         | Table S23     |
| 19- Frequency dependent First hyperpolarizability ( <i>e.s.u.</i> ) of studied compound 4-7.                                                                                                                                   | Table S24     |
| 20- Characterization by NMR & FTIR 4-7.                                                                                                                                                                                        |               |
| 21- <i>In Vitro</i> Antioxidant Activity of synthesized compounds (4-7)                                                                                                                                                        | Table S25     |
| 22- Urease Inhibitory Activity of synthesized compounds (4-7)                                                                                                                                                                  | Table S26     |

**Table S1:** Optimization of reaction conditions for the synthesis of compound 7.

| Entry | Solvent                         | Catalyst (mol %)               | Time (h) | Yield <sup>a</sup> (%) |
|-------|---------------------------------|--------------------------------|----------|------------------------|
| 1     | H <sub>2</sub> O                | No                             | 24       | <sup>b</sup>           |
| 2     | H <sub>2</sub> O                | p-TsOH                         | 24       | <sup>b</sup>           |
| 3     | Et-OH                           | Et <sub>3</sub> N              | 24       | 35                     |
| 4     | Et-OH                           | L-Proline                      | 24       | 45                     |
| 5     | Et-OH                           | AcOH                           | 24       | 70                     |
| 6     | Et-OH                           | InCl <sub>3</sub>              | 12       | 60                     |
| 7     | Et-OH                           | H <sub>2</sub> SO <sub>4</sub> | 09       | 46                     |
| 8     | Et-OH                           | p-TSA                          | 09       | <b>89</b>              |
| 9     | CH <sub>3</sub> CN              | p-TSA                          | 09       | 65                     |
| 10    | CH <sub>3</sub> CN              | L-Proline                      | 09       | 72                     |
| 11    | DMF                             | p-TSA                          | 09       | 55                     |
| 12    | THF                             | InCl <sub>3</sub>              | 09       | 45                     |
| 13    | CH <sub>2</sub> Cl <sub>2</sub> | p-TsOH                         | 09       | 42                     |
| 14    | CH <sub>2</sub> Cl <sub>2</sub> | DABCO                          | 09       | Trace                  |

<sup>a</sup> Isolated yield<sup>b</sup> No product formed**Table S2:** Synthesized 2-aminopyrazine derived fused ring heterocyclic compounds (4-7).

| Entry | Product | Ar-CHO                                                                              | Structure of Product (4-7)                                                           | M.P. (°C) | Yield (%) |
|-------|---------|-------------------------------------------------------------------------------------|--------------------------------------------------------------------------------------|-----------|-----------|
| 1     | 4       | 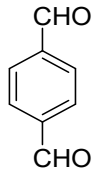 |  | 180       | 82        |

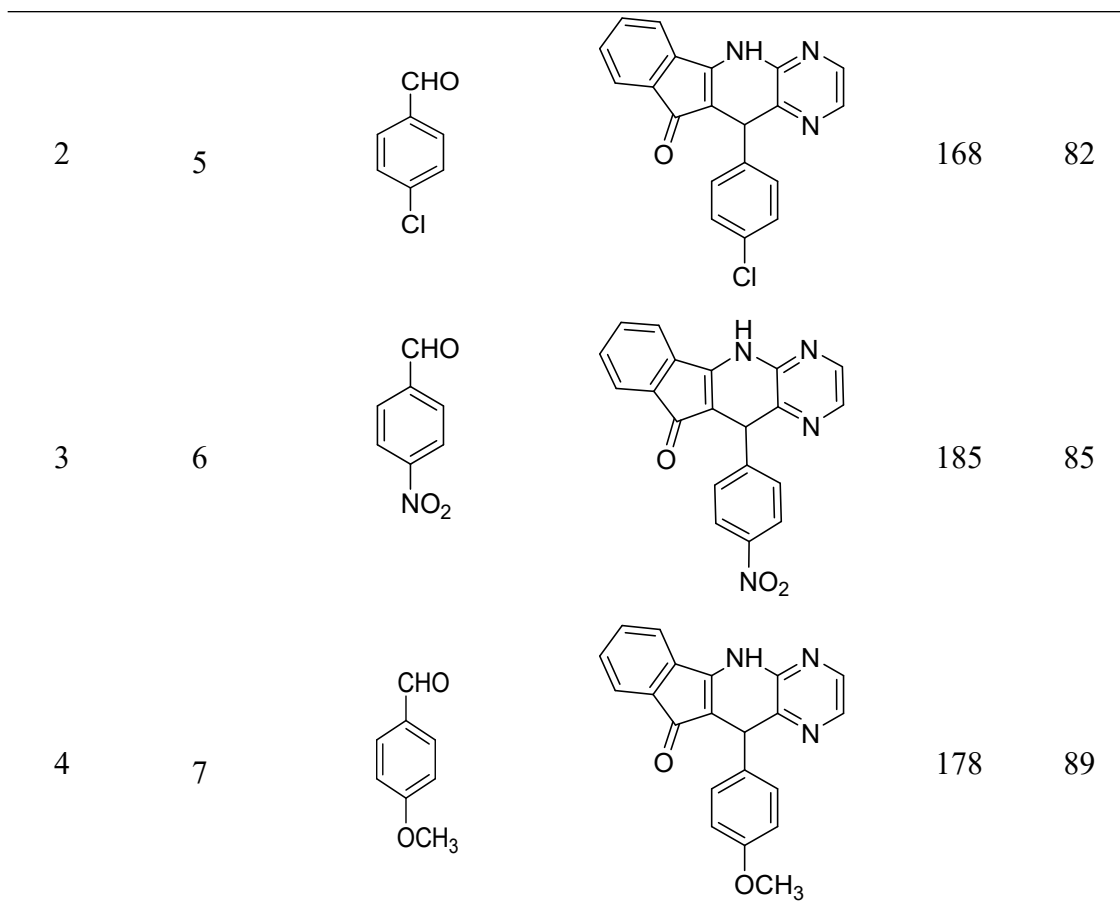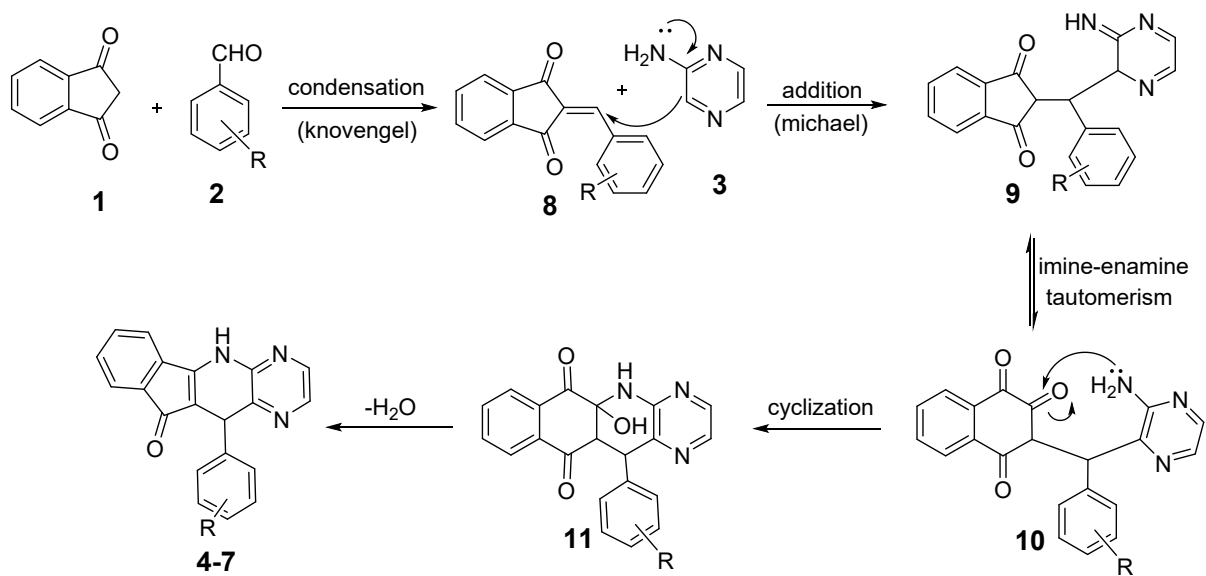

**Scheme S1:** General mechanism for synthesis of (4-7).

**Table S3:** NBO table of compound 4.

| Donor( <i>i</i> ) | Type | Acceptor( <i>j</i> ) | Type | <i>E</i> (2) <sup>a</sup> | <i>E</i> ( <i>J</i> ) <i>E</i> ( <i>i</i> ) <sup>b</sup> | <i>F</i> ( <i>i</i> , <i>j</i> ) <sup>c</sup> |
|-------------------|------|----------------------|------|---------------------------|----------------------------------------------------------|-----------------------------------------------|
| C13-N32           | π    | C28-C30              | π*   | 24.07                     | 0.34                                                     | 0.081                                         |
| C16-C18           | π    | C21-C23              | π*   | 23.4                      | 0.28                                                     | 0.072                                         |
| C17-C19           | π    | C16-C18              | π*   | 22.14                     | 0.29                                                     | 0.072                                         |
| C2-C3             | π    | C4-C5                | π*   | 21.31                     | 0.29                                                     | 0.07                                          |
| C12-N33           | π    | C28-C30              | π*   | 21.5                      | 0.33                                                     | 0.075                                         |
| C28-C30           | π    | C12-N33              | π*   | 20.4                      | 0.28                                                     | 0.067                                         |
| C12-N33           | π    | C13-N32              | π*   | 19.15                     | 0.3                                                      | 0.07                                          |
| C4-C5             | π    | C1-C6                | π*   | 18.91                     | 0.29                                                     | 0.067                                         |
| C13-N32           | π    | C12-N33              | π*   | 15.82                     | 0.33                                                     | 0.065                                         |
| C2-C3             | π    | C26-O27              | π*   | 14.83                     | 0.29                                                     | 0.06                                          |
| C14-C15           | π    | C4-C5                | π*   | 13.66                     | 0.3                                                      | 0.06                                          |
| C37-O38           | π    | C21-C23              | π*   | 5.09                      | 0.41                                                     | 0.045                                         |
| C26-O27           | π    | C14-C15              | π*   | 4.63                      | 0.4                                                      | 0.041                                         |
| C5-C6             | σ    | C4-C14               | σ*   | 5.82                      | 1.15                                                     | 0.073                                         |
| C5-H9             | σ    | C3-C4                | σ*   | 4.69                      | 1.09                                                     | 0.064                                         |
| C3-C26            | σ    | C4-C5                | σ*   | 4.35                      | 1.2                                                      | 0.065                                         |
| C5-C6             | σ    | C4-C5                | σ*   | 4.04                      | 1.28                                                     | 0.064                                         |
| C37-H39           | σ    | C19-C23              | σ*   | 3.98                      | 1.1                                                      | 0.059                                         |
| C11-C12           | σ    | C30-N33              | σ*   | 3.74                      | 1.15                                                     | 0.059                                         |
| C19-C23           | σ    | C17-C19              | σ*   | 3.16                      | 1.28                                                     | 0.057                                         |
| C11-C12           | σ    | C13-N32              | σ*   | 2.81                      | 1.14                                                     | 0.051                                         |
| C21-C23           | σ    | C19-H24              | σ*   | 2.21                      | 1.15                                                     | 0.045                                         |
| C15-C26           | σ    | C11-C15              | σ*   | 2.13                      | 1.07                                                     | 0.042                                         |
| C11-C16           | σ    | C16-C18              | σ*   | 1.99                      | 1.19                                                     | 0.044                                         |
| C13-N34           | σ    | C12-C13              | σ*   | 1.58                      | 1.33                                                     | 0.041                                         |

|         |          |         |            |       |      |       |
|---------|----------|---------|------------|-------|------|-------|
| C28-N32 | $\sigma$ | C30-H31 | $\sigma^*$ | 1.44  | 1.27 | 0.038 |
| C16-C17 | $\sigma$ | C17-H20 | $\sigma^*$ | 1.36  | 1.14 | 0.035 |
| C12-N33 | $\sigma$ | C30-N33 | $\sigma^*$ | 1.33  | 1.38 | 0.038 |
| C3-C4   | $\sigma$ | C3-C26  | $\sigma^*$ | 1.03  | 1.09 | 0.03  |
| C6-H10  | $\sigma$ | C5-H9   | $\sigma^*$ | 0.64  | 0.95 | 0.022 |
| C2-H8   | $\sigma$ | C1-C2   | $\sigma^*$ | 0.56  | 1.07 | 0.022 |
| N34     | LP(1)    | C13-N32 | $\pi^*$    | 42.85 | 0.27 | 0.098 |
| O27     | LP(2)    | C15-C26 | $\sigma^*$ | 19.12 | 0.72 | 0.106 |
| O38     | LP(1)    | C23-C37 | $\sigma^*$ | 1.91  | 1.14 | 0.042 |
| O38     | LP(1)    | C37-H39 | $\sigma^*$ | 0.51  | 1.06 | 0.021 |

**Table S4:** NBO table of compound **5**.

| Donor( <i>i</i> ) | Type     | Acceptor( <i>j</i> ) | Type       | E(2) <sup>a</sup> | E(J)E(i) <sup>b</sup> | F(i,j) <sup>c</sup> |
|-------------------|----------|----------------------|------------|-------------------|-----------------------|---------------------|
| C13-N32           | $\pi$    | C28-C30              | $\pi^*$    | 24.11             | 0.34                  | 0.081               |
| C16-C17           | $\pi$    | C19-C23              | $\pi^*$    | 22.47             | 0.27                  | 0.07                |
| C18-C21           | $\pi$    | C19-C23              | $\pi^*$    | 21.79             | 0.27                  | 0.069               |
| C12-N33           | $\pi$    | C28-C30              | $\pi^*$    | 21.55             | 0.32                  | 0.075               |
| C2-C3             | $\pi$    | C4-C5                | $\pi^*$    | 21.32             | 0.29                  | 0.07                |
| C4-C5             | $\pi$    | C2-C3                | $\pi^*$    | 17.97             | 0.31                  | 0.067               |
| C1-C6             | $\pi$    | C4-C5                | $\pi^*$    | 18.14             | 0.29                  | 0.065               |
| C2-C3             | $\pi$    | C1-C6                | $\pi^*$    | 18.69             | 0.28                  | 0.066               |
| C19-C23           | $\pi$    | C18-C21              | $\pi^*$    | 19.45             | 0.3                   | 0.069               |
| C16-C17           | $\pi$    | C18-C21              | $\pi^*$    | 20.27             | 0.29                  | 0.068               |
| C28-C30           | $\pi$    | C13-N32              | $\pi^*$    | 17.73             | 0.26                  | 0.062               |
| C14-C15           | $\pi$    | C4-C5                | $\pi^*$    | 13.78             | 0.3                   | 0.06                |
| C26-O27           | $\pi$    | C14-C15              | $\pi^*$    | 4.64              | 0.4                   | 0.041               |
| C26-O27           | $\pi$    | C2-C3                | $\pi^*$    | 4.31              | 0.41                  | 0.04                |
| C14-C15           | $\pi$    | C14-C15              | $\pi^*$    | 3.01              | 0.31                  | 0.028               |
| C30-H31           | $\sigma$ | C12-N33              | $\sigma^*$ | 5.16              | 1.07                  | 0.066               |
| C4-C14            | $\sigma$ | C11-C15              | $\sigma^*$ | 4.77              | 1.08                  | 0.064               |
| C21-H25           | $\sigma$ | C19-C23              | $\sigma^*$ | 4.46              | 1.08                  | 0.062               |
| C30-N33           | $\sigma$ | C11-C12              | $\sigma^*$ | 4.02              | 1.22                  | 0.063               |
| C30-H31           | $\sigma$ | C28-N32              | $\sigma^*$ | 3.98              | 1.06                  | 0.058               |
| C13-N32           | $\sigma$ | C12-C13              | $\sigma^*$ | 3.66              | 1.37                  | 0.064               |
| C11-C15           | $\sigma$ | C4-C14               | $\sigma^*$ | 2.96              | 1.07                  | 0.05                |
| C13-N34           | $\sigma$ | C28-N32              | $\sigma^*$ | 2.43              | 1.34                  | 0.051               |
| C11-C12           | $\sigma$ | C12-N33              | $\sigma^*$ | 2.04              | 1.16                  | 0.044               |
| C12-C13           | $\sigma$ | N34-H35              | $\sigma^*$ | 1.99              | 1.11                  | 0.042               |
| C11-C16           | $\sigma$ | C11-C12              | $\sigma^*$ | 1.46              | 0.99                  | 0.034               |
| C16-C18           | $\sigma$ | C11-C12              | $\sigma^*$ | 1.27              | 1.07                  | 0.033               |

|         |          |         |            |       |      |       |
|---------|----------|---------|------------|-------|------|-------|
| C5-C6   | $\sigma$ | C5-H9   | $\sigma^*$ | 1.07  | 1.12 | 0.031 |
| C26-O27 | $\sigma$ | C14-C15 | $\sigma^*$ | 0.55  | 1.68 | 0.027 |
| C12-C13 | $\sigma$ | C11-C16 | $\sigma^*$ | 0.51  | 1.13 | 0.022 |
| C3-C26  | $\sigma$ | C14-N34 | $\sigma^*$ | 0.5   | 1.08 | 0.021 |
| N34     | LP(1)    | C13-N32 | $\pi^*$    | 42.78 | 0.27 | 0.098 |
| Cl37    | LP(3)    | C19-C23 | $\pi^*$    | 12.03 | 0.33 | 0.062 |
| Cl37    | LP(1)    | C21-C23 | $\sigma^*$ | 1.61  | 1.48 | 0.044 |
| N33     | LP(1)    | C13-N34 | $\sigma^*$ | 0.52  | 0.76 | 0.018 |

**Table S5:** NBO table of compound **6**.

| Donor( <i>i</i> ) | Type     | Acceptor( <i>j</i> ) | Type       | E(2) <sup>a</sup> | E(J)E(i) <sup>b</sup> | F(i,j) <sup>c</sup> |
|-------------------|----------|----------------------|------------|-------------------|-----------------------|---------------------|
| C14-C15           | $\pi$    | C26-O27              | $\pi^*$    | 25.9              | 0.3                   | 0.079               |
| C16-C17           | $\pi$    | C19-C23              | $\pi^*$    | 24.58             | 0.27                  | 0.074               |
| C13-N32           | $\pi$    | C28-C30              | $\pi^*$    | 24.1              | 0.34                  | 0.081               |
| C18-C21           | $\pi$    | C16-C17              | $\pi^*$    | 22.66             | 0.29                  | 0.072               |
| C12-N33           | $\pi$    | C28-C30              | $\pi^*$    | 21.37             | 0.33                  | 0.075               |
| C16-C17           | $\pi$    | C18-C21              | $\pi^*$    | 17.73             | 0.29                  | 0.065               |
| C13-N32           | $\pi$    | C12-N33              | $\pi^*$    | 15.88             | 0.33                  | 0.065               |
| C4-C5             | $\pi$    | C14-C15              | $\pi^*$    | 14.14             | 0.3                   | 0.059               |
| C14-C15           | $\pi$    | C4-C5                | $\pi^*$    | 13.52             | 0.31                  | 0.059               |
| N37-O39           | $\pi$    | N37-O39              | $\pi^*$    | 7.55              | 0.32                  | 0.053               |
| C26-O27           | $\pi$    | C14-C15              | $\pi^*$    | 4.62              | 0.4                   | 0.041               |
| C26-O27           | $\pi$    | C2-C3                | $\pi^*$    | 4.29              | 0.41                  | 0.04                |
| N37-O39           | $\pi$    | C19-C23              | $\pi^*$    | 4.11              | 0.46                  | 0.043               |
| C14-C15           | $\pi$    | C14-C15              | $\pi^*$    | 3.11              | 0.31                  | 0.028               |
| C16-C17           | $\pi$    | C14-C15              | $\pi^*$    | 0.78              | 0.28                  | 0.014               |
| C4-C14            | $\sigma$ | C11-C15              | $\sigma^*$ | 4.82              | 1.08                  | 0.064               |
| C21-H25           | $\sigma$ | C16-C18              | $\sigma^*$ | 3.99              | 1.09                  | 0.059               |
| C14-C15           | $\sigma$ | C14-N34              | $\sigma^*$ | 2.94              | 1.18                  | 0.053               |

|         |          |         |            |       |      |       |
|---------|----------|---------|------------|-------|------|-------|
| C14-C15 | $\sigma$ | C15-C26 | $\sigma^*$ | 1.99  | 1.19 | 0.044 |
| C3-C26  | $\sigma$ | C3-C4   | $\sigma^*$ | 1.83  | 1.18 | 0.041 |
| C12-N33 | $\sigma$ | C30-N33 | $\sigma^*$ | 1.33  | 1.38 | 0.038 |
| C11-C16 | $\sigma$ | C12-C13 | $\sigma^*$ | 1.2   | 1.11 | 0.033 |
| C17-C19 | $\sigma$ | C17-H20 | $\sigma^*$ | 1.15  | 1.15 | 0.033 |
| N37-O39 | $\sigma$ | C23-N37 | $\sigma^*$ | 1     | 1.37 | 0.034 |
| C5-C6   | $\sigma$ | C6-H10  | $\sigma^*$ | 0.92  | 1.14 | 0.029 |
| C12-N33 | $\sigma$ | C11-C15 | $\sigma^*$ | 0.83  | 1.27 | 0.029 |
| C23-N37 | $\sigma$ | C19-C23 | $\sigma^*$ | 0.79  | 1.36 | 0.029 |
| C3-C26  | $\sigma$ | C15-C26 | $\sigma^*$ | 0.72  | 1.08 | 0.025 |
| C1-H7   | $\sigma$ | C1-C6   | $\sigma^*$ | 0.69  | 1.1  | 0.025 |
| C17-H20 | $\sigma$ | C19-H24 | $\sigma^*$ | 0.62  | 0.97 | 0.022 |
| C26-O27 | $\sigma$ | C14-C15 | $\sigma^*$ | 0.55  | 1.67 | 0.027 |
| C12-C13 | $\sigma$ | C11-C16 | $\sigma^*$ | 0.53  | 1.12 | 0.022 |
| N34     | LP(1)    | C14-C15 | $\pi^*$    | 43.94 | 0.32 | 0.108 |
| N34     | LP(1)    | C13-N32 | $\pi^*$    | 42.82 | 0.27 | 0.098 |
| O39     | LP(2)    | C18-C21 | $\sigma^*$ | 0.54  | 0.86 | 0.02  |
| N33     | LP(1)    | C13-N34 | $\sigma^*$ | 0.52  | 0.76 | 0.018 |

**Table S6:** NBO table of compound 7.

| Donor( <i>i</i> ) | Type  | Acceptor( <i>j</i> ) | Type    | <i>E</i> (2) <sup>a</sup> | <i>E</i> ( <i>J</i> ) <i>E</i> ( <i>i</i> ) <sup>b</sup> | <i>F</i> ( <i>i</i> , <i>j</i> ) <sup>c</sup> |
|-------------------|-------|----------------------|---------|---------------------------|----------------------------------------------------------|-----------------------------------------------|
| C13-N32           | $\Pi$ | C28-C30              | $\pi^*$ | 23.94                     | 0.34                                                     | 0.08                                          |
| C16-C18           | $\Pi$ | C17-C19              | $\pi^*$ | 21.98                     | 0.28                                                     | 0.07                                          |
| C28-C30           | $\Pi$ | C12-N33              | $\pi^*$ | 19.59                     | 0.28                                                     | 0.066                                         |
| C2-C3             | $\Pi$ | C1-C6                | $\pi^*$ | 18.86                     | 0.28                                                     | 0.066                                         |
| C28-C30           | $\Pi$ | C13-N32              | $\pi^*$ | 17.54                     | 0.26                                                     | 0.062                                         |
| C21-C23           | $\Pi$ | C17-C19              | $\pi^*$ | 16.89                     | 0.3                                                      | 0.063                                         |
| C13-N32           | $\Pi$ | C12-N33              | $\pi^*$ | 15.65                     | 0.33                                                     | 0.065                                         |
| C2-C3             | $\Pi$ | C26-O27              | $\pi^*$ | 14.38                     | 0.29                                                     | 0.06                                          |



|             |          |         |            |       |      |       |
|-------------|----------|---------|------------|-------|------|-------|
| C4-C5       | $\Pi$    | C14-C15 | $\pi^*$    | 13.74 | 0.3  | 0.058 |
| C26-<br>O27 | $\Pi$    | C14-C15 | $\pi^*$    | 4.68  | 0.4  | 0.041 |
| C26-<br>O27 | $\Pi$    | C2-C3   | $\pi^*$    | 4.39  | 0.41 | 0.04  |
| C14-<br>C15 | $\Pi$    | C14-C15 | $\pi^*$    | 2.97  | 0.31 | 0.028 |
| C5-C6       | $\Sigma$ | C4-C14  | $\sigma^*$ | 5.79  | 1.15 | 0.073 |
| C30-<br>H31 | $\Sigma$ | C12-N33 | $\sigma^*$ | 5.14  | 1.08 | 0.066 |
| C1-C2       | $\Sigma$ | C3-C26  | $\sigma^*$ | 4.97  | 1.11 | 0.067 |
| C3-C26      | $\Sigma$ | C4-C5   | $\sigma^*$ | 4.38  | 1.2  | 0.065 |
| C18-<br>C21 | $\Sigma$ | C16-C18 | $\sigma^*$ | 4     | 1.28 | 0.064 |
| C21-<br>C23 | $\Sigma$ | C18-C21 | $\sigma^*$ | 3.44  | 1.29 | 0.06  |
| C14-<br>C15 | $\Sigma$ | C14-N34 | $\sigma^*$ | 2.99  | 1.18 | 0.053 |
| C2-C3       | $\Sigma$ | C4-C14  | $\sigma^*$ | 2.16  | 1.16 | 0.045 |
| C14-<br>N34 | $\Sigma$ | C13-N32 | $\sigma^*$ | 1.99  | 1.37 | 0.047 |
| C28-<br>N32 | $\Sigma$ | C28-C30 | $\sigma^*$ | 1.53  | 1.39 | 0.041 |
| C11-<br>C15 | $\Sigma$ | C11-H36 | $\sigma^*$ | 0.98  | 1.04 | 0.029 |
| C14-<br>C15 | $\Sigma$ | C11-C16 | $\sigma^*$ | 0.64  | 1.13 | 0.024 |
| N34         | LP(1)    | C13-N32 | $\pi^*$    | 42.55 | 0.27 | 0.098 |
| O37         | LP(2)    | C21-C23 | $\pi^*$    | 30.25 | 0.34 | 0.097 |
| O27         | LP(2)    | C15-C26 | $\sigma^*$ | 19.48 | 0.72 | 0.107 |
| N32         | LP(1)    | C12-C13 | $\sigma^*$ | 10.78 | 0.87 | 0.087 |
| O37         | LP(1)    | C21-C23 | $\sigma^*$ | 7.16  | 1.11 | 0.08  |
| N32         | LP(1)    | C13-N34 | $\sigma^*$ | 4.73  | 0.78 | 0.055 |
| O37         | LP(1)    | C38-H40 | $\sigma^*$ | 3.04  | 0.94 | 0.048 |
| N33         | LP(1)    | C13-N34 | $\sigma^*$ | 0.52  | 0.76 | 0.018 |

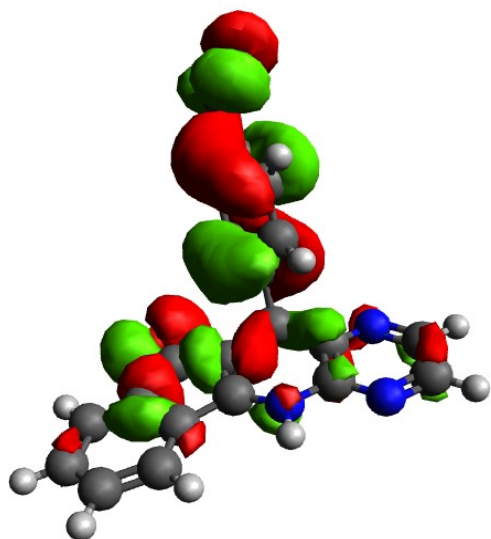

HOMO -1

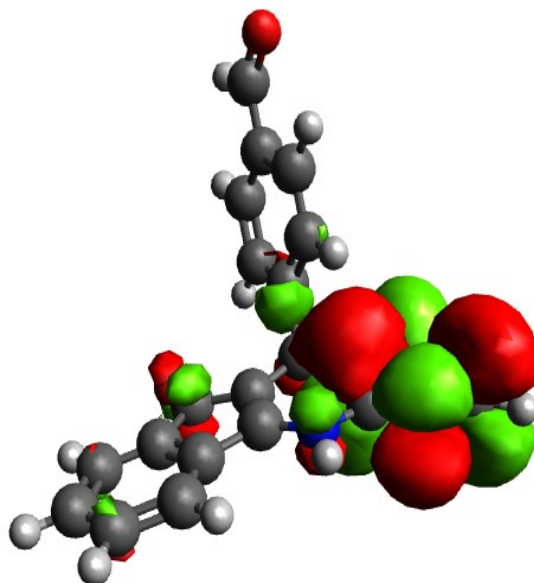

LUMO +1

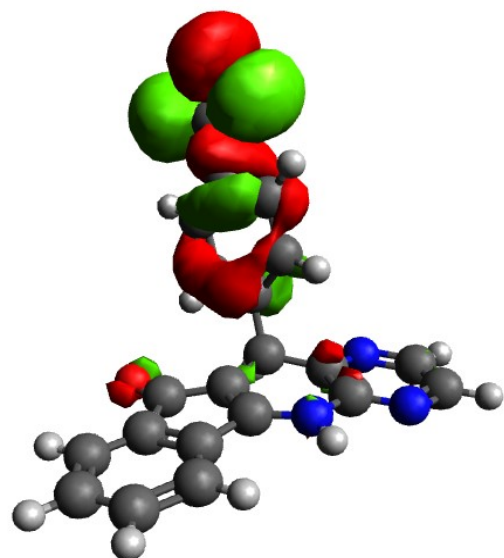

HOMO -2

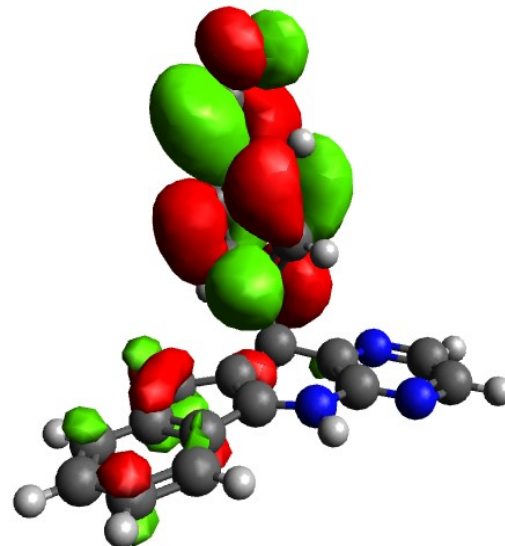

LUMO +2

D4

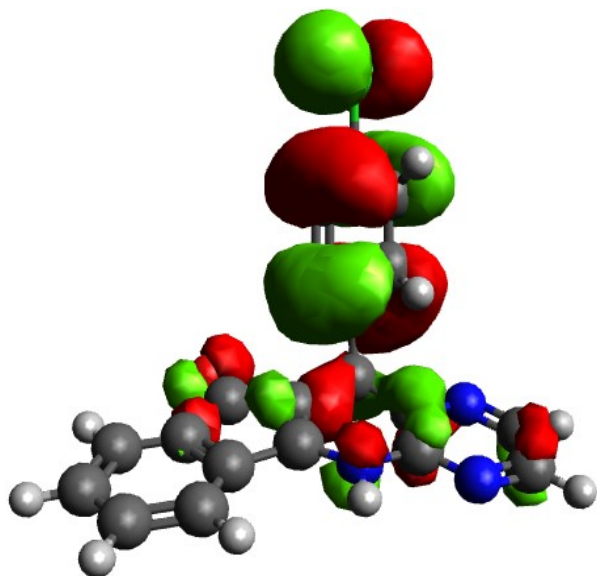

HOMO -1

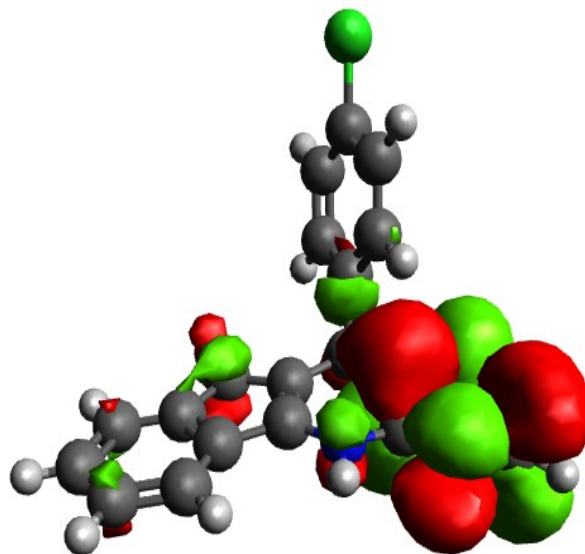

LUMO +1

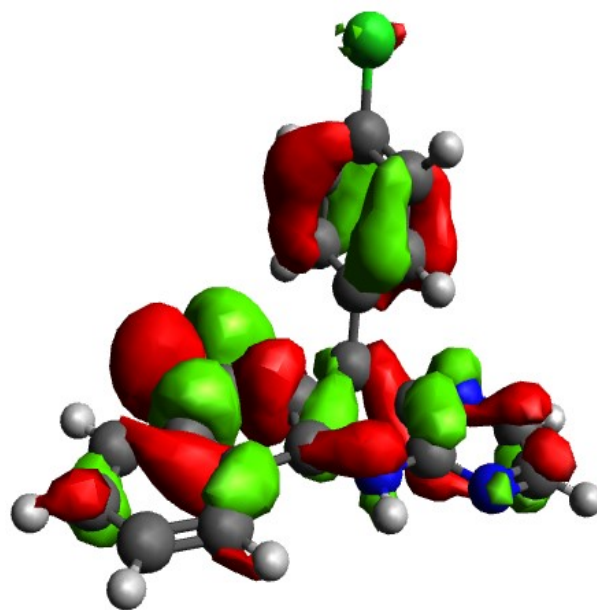

HOMO -2

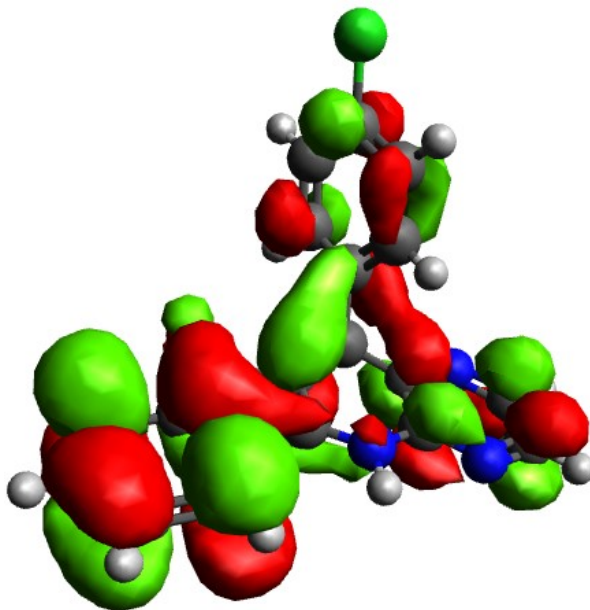

LUMO +2

D5

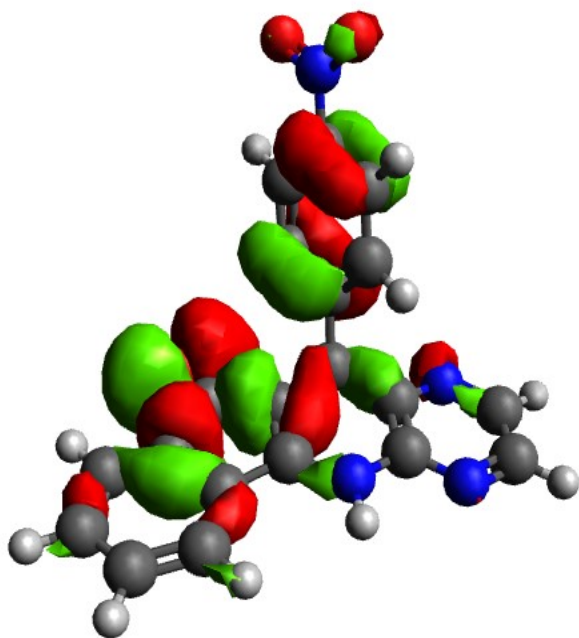

HOMO -1

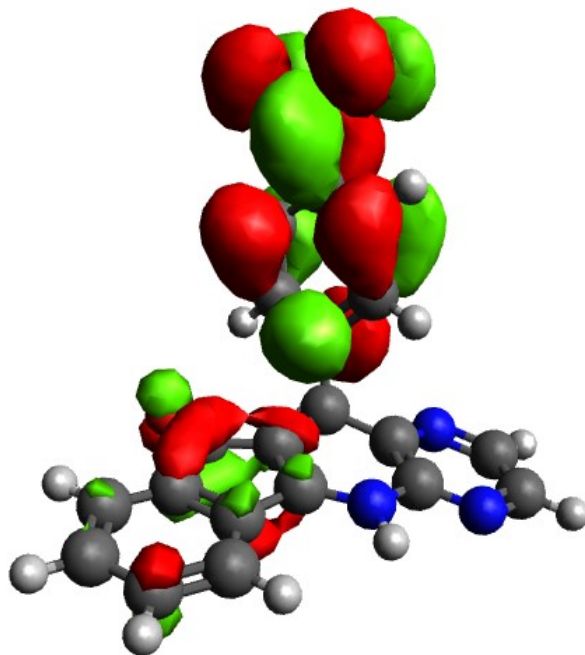

LUMO +1

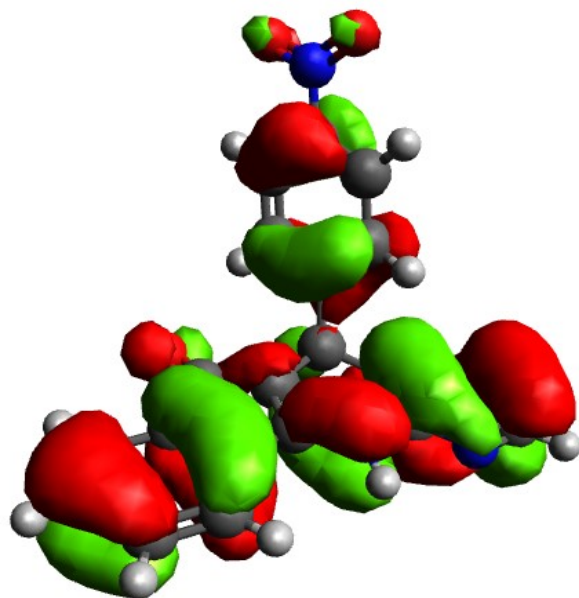

HOMO -2

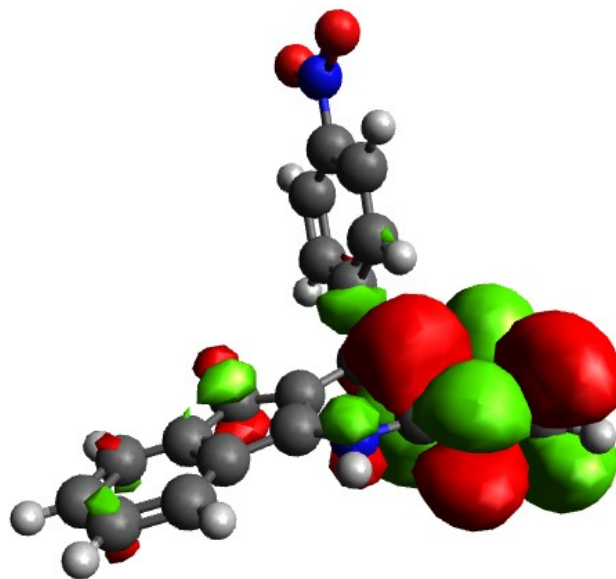

LUMO +2

D6

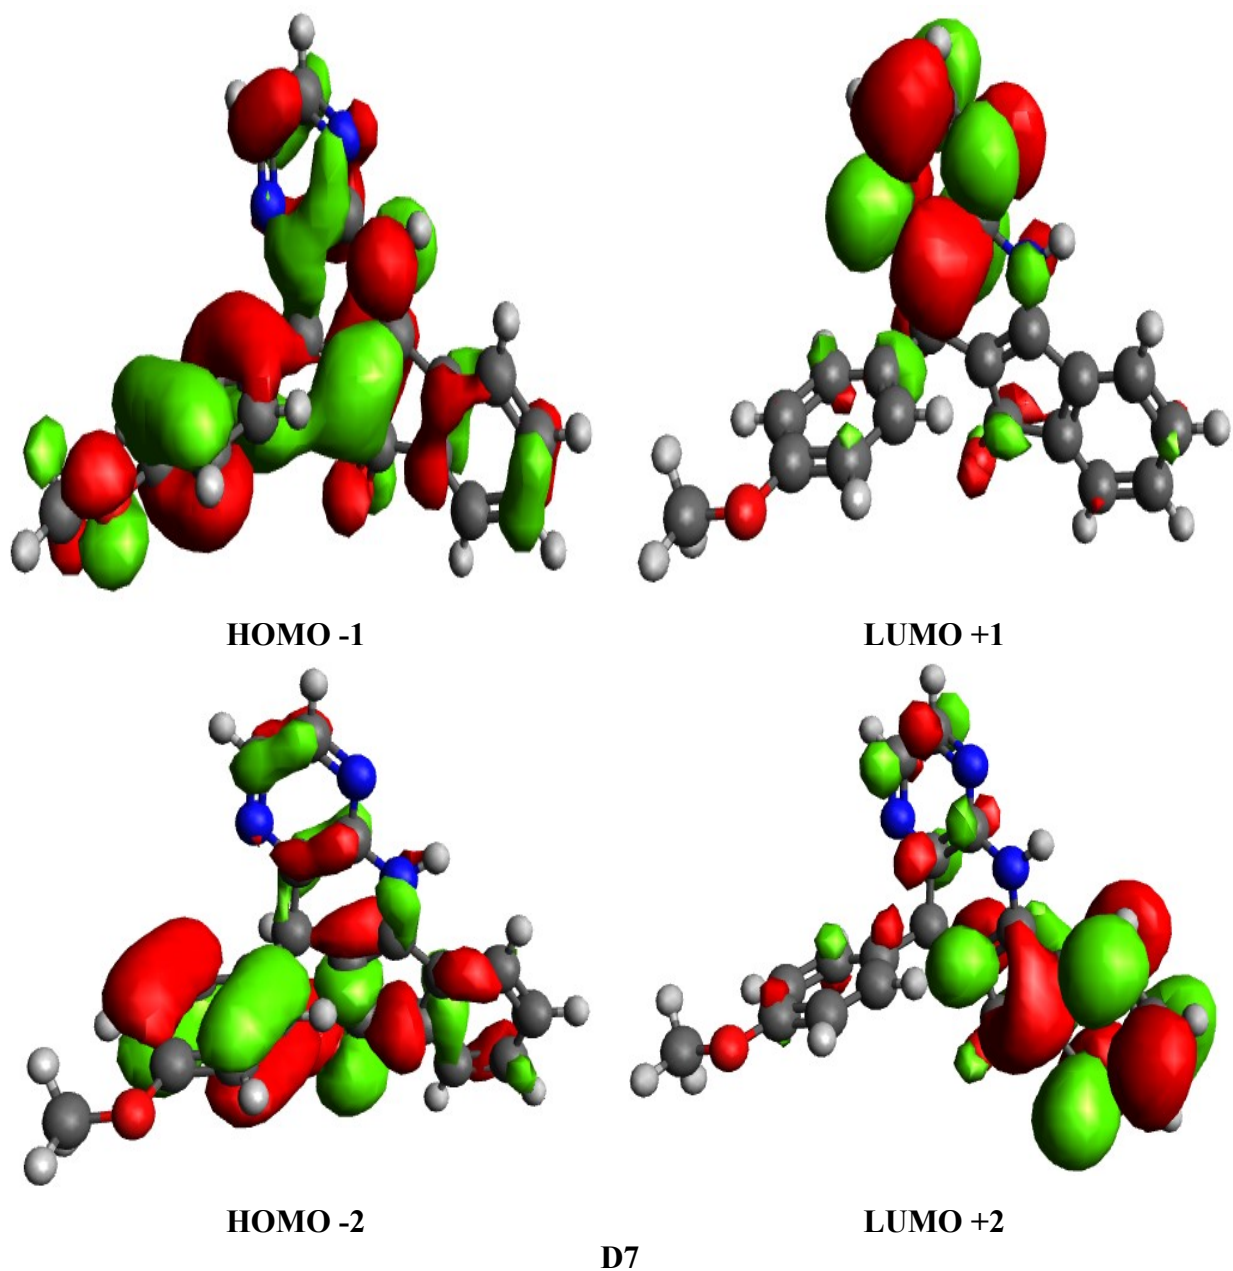

**Figure S1:** HOMO-1, LUMO+1, HOMO-2 and LUMO+2 of the studied compounds **4 to 7**.

**Table S7:** Computed energies ( $E$ ) and energy gap ( $E_{\text{LUMO}}-E_{\text{HOMO}}$ ) of HOMO and LUMO of investigated compounds in  $eV$ .

| Compounds | $E_{\text{HOMO}}$ | $E_{\text{LUMO}}$ | $E_{\text{gap}}$ |
|-----------|-------------------|-------------------|------------------|
| <b>4</b>  | -6.131            | -2.665            | 3.466            |
| <b>5</b>  | -6.068            | -2.604            | 3.646            |
| <b>6</b>  | -6.261            | -2.789            | 3.472            |
| <b>7</b>  | -5.858            | -2.414            | 3.444            |

**Table S8:** Calculated energies ( $E$ ) and energy gap ( $\Delta E$ ) of HOMO-1, LUMO+1, HOMO-2 and LUMO+2 for **D4-D7**.

| Comp.     | HOMO-1 | LUMO+1 | $\Delta E$ | HOMO-2 | LUMO+2 | $\Delta E$ |
|-----------|--------|--------|------------|--------|--------|------------|
| <b>D4</b> | -6.967 | -1.895 | 5.072      | -6.978 | -1.765 | 5.213      |
| <b>D5</b> | -6.647 | -1.848 | 4.799      | -7.052 | -1.04  | 6.012      |
| <b>D6</b> | -7.192 | -2.377 | 4.815      | -7.306 | -2.028 | 5.278      |
| <b>D7</b> | -5.965 | -2.414 | 3.551      | -6.834 | 0.867  | 5.967      |

**Table S9:** Global reactivity parameters of (**4-7**) compounds.

| Comp.     | $IP$  | $EA$  | $X$   | $\eta$ | $\mu$  | $\omega$ | $\sigma$ | $\Delta N_{max}$ |
|-----------|-------|-------|-------|--------|--------|----------|----------|------------------|
| <b>D4</b> | 6.131 | 2.665 | 4.398 | 1.733  | -4.398 | 5.580    | 0.288    | 2.537            |
| <b>D5</b> | 6.068 | 2.604 | 4.336 | 1.732  | -4.336 | 5.427    | 0.288    | 2.503            |
| <b>D6</b> | 6.261 | 2.789 | 4.525 | 1.736  | -4.525 | 5.897    | 0.288    | 2.606            |
| <b>D7</b> | 5.858 | 2.414 | 4.136 | 1.722  | -4.136 | 4.967    | 0.290    | 2.401            |

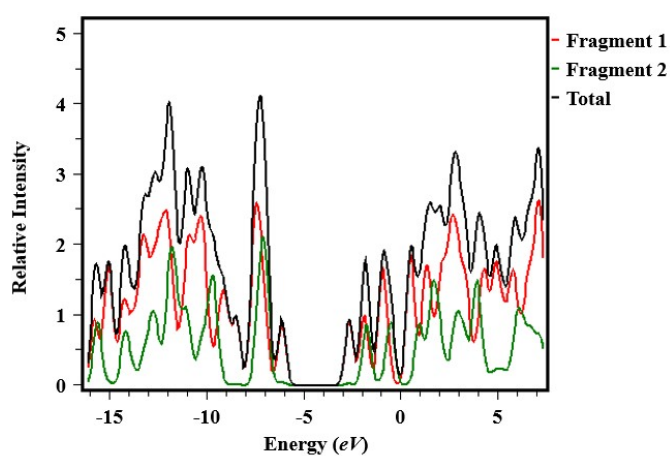

4

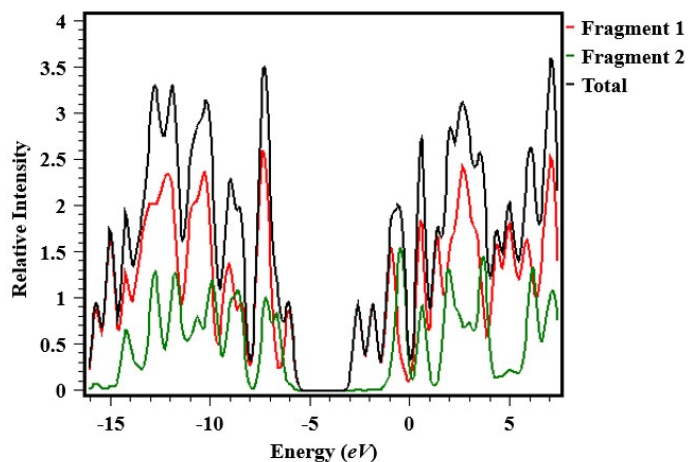

5

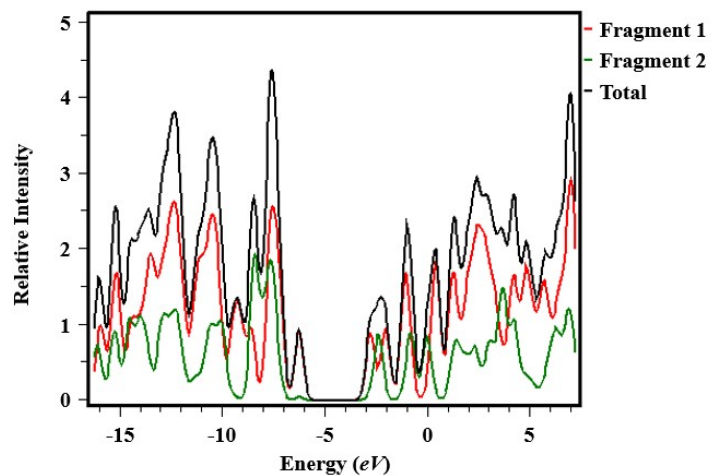

6

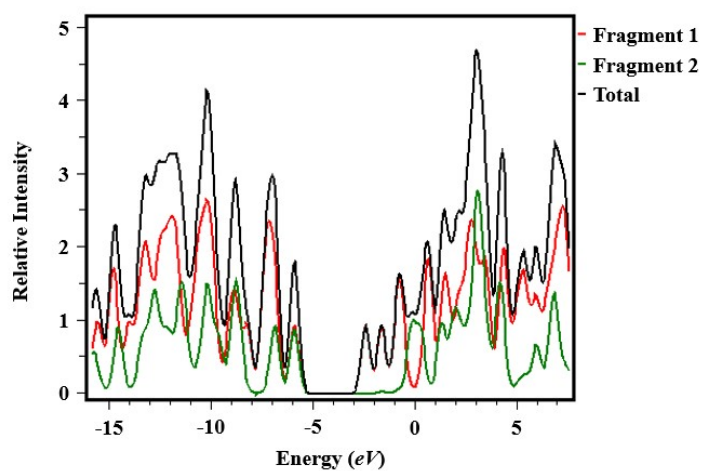

7

**Figure S2:** DOS graphs of 4-7 compounds.

**Table S10:** DOS %age of HOMO and LUMO for 4-7 compounds.

| HOMO DOS %age |            |            |
|---------------|------------|------------|
| Compounds     | Fragment 1 | Fragment 2 |
| 4             | 94.7       | 5.3        |
| 5             | 92.7       | 7.3        |
| 6             | 95.3       | 4.7        |
| 7             | 52.6       | 47.4       |
| LUMO DOS %age |            |            |
| Compounds     | Fragment 1 | Fragment 2 |
| 4             | 97.3       | 2.7        |
| 5             | 99.0       | 1.0        |
| 6             | 92.9       | 7.1        |
| 7             | 99.5       | 0.5        |

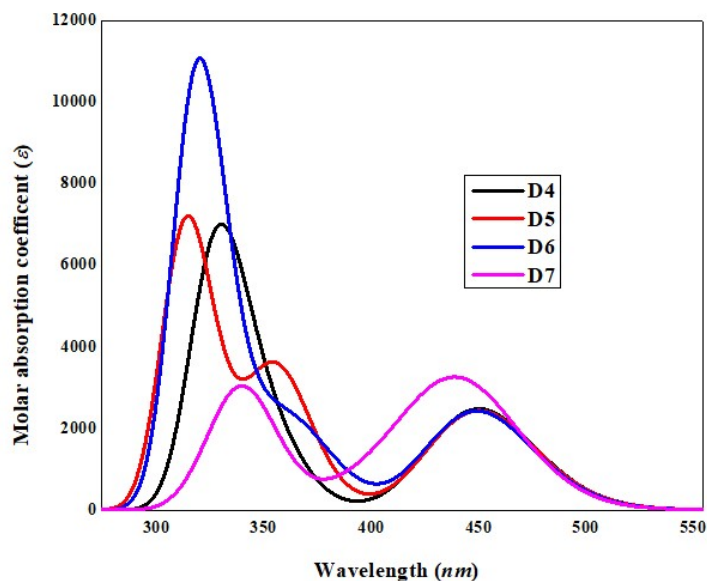

**Figure S3:** Absorption spectra of compounds 4-7 in gaseous phase.

**Table S11:** Transition energy ( $E$ ), maximum absorption wavelength ( $\lambda_{max}$ ), oscillator strength ( $f_{os}$ ), and major transition contributions of studied compounds (4-7).

| Comp. | DFT<br>$\lambda$ (nm) | $E$ (eV) | $f$   | MO contributions                                                                               |
|-------|-----------------------|----------|-------|------------------------------------------------------------------------------------------------|
| 4     | 323.693               | 3.830    | 0.083 | H-3→L (26%), H-2→L (11%), H-1→L (26%),<br>H→L+2 (29%), H-5→L (2%), H-4→L (4%)                  |
| 5     | 310.131               | 3.998    | 0.092 | H-4→L (23%), H-3→L (46%), H-2→L (10%), H-<br>6→L (2%), H-5→L (8%), H-5→L+1 (2%),<br>H→L+2 (5%) |
| 6     | 315.417               | 3.931    | 0.152 | H-2→L (90%), H-1→L (2%)                                                                        |
| 7     | 443.704               | 2.794    | 0.031 | H-1→L (10%), H→L (87%),                                                                        |

MO=molecular orbital; H=HOMO, L=LUMO

**Table S12:** UV-Visible analysis of compound 4.

| N<br>O | DFT<br>$\lambda$ (nm) | $E$ (eV) | $f$   | MO contributions                                           |
|--------|-----------------------|----------|-------|------------------------------------------------------------|
| 1      | 445.68                | 2.782    | 0.034 | H→L (97%),                                                 |
| 2      | 396.07                | 3.130    | 0.000 | H-4→L (10%), H-3→L (33%), H-1→L (48%), H-<br>5→L (3%)      |
| 3      | 348.96                | 3.553    | 0.021 | H→L+1 (98%),                                               |
| 4      | 339.22                | 3.655    | 0.000 | H-2→L (24%), H-2→L+2 (60%), H-2→L+8 (2%), H-<br>1→L+2 (8%) |
| 5      | 330.07                | 3.756    | 0.010 | H-3→L (18%), H-1→L (11%), H→L+2 (66%),                     |



|   |             |       |       |                                                                               |
|---|-------------|-------|-------|-------------------------------------------------------------------------------|
| 6 | 323.69<br>3 | 3.830 | 0.083 | H-3→L (26%), H-2→L (11%), H-1→L (26%),<br>H→L+2 (29%), H-5→L (2%), H-4→L (4%) |
|---|-------------|-------|-------|-------------------------------------------------------------------------------|

**Table S13:** UV-Visible analysis of compound 5.

| <b>N</b> | <b>DFT</b>                       | <b>E(eV)</b> | <b><i>f</i></b> | <b>MO contributions</b>                                                                        |
|----------|----------------------------------|--------------|-----------------|------------------------------------------------------------------------------------------------|
| <b>O</b> | <b><math>\lambda</math> (nm)</b> |              |                 |                                                                                                |
| 1        | 445.76<br>2                      | 2.781        | 0.034           | H→L (97%),                                                                                     |
| 2        | 396.31<br>8                      | 3.128        | 0.001           | H-2→L (68%), H-1→L (18%), H-3→L (9%)                                                           |
| 3        | 352.44<br>8                      | 3.518        | 0.023           | H-2→L (13%), H-1→L (60%), H→L+1 (26%),                                                         |
| 4        | 349.57<br>6                      | 3.547        | 0.026           | H-1→L (21%), H→L+1 (73%), H-2→L (4%)                                                           |
| 5        | 310.13<br>1                      | 3.998        | 0.092           | H-4→L (23%), H-3→L (46%), H-2→L (10%), H-<br>6→L (2%), H-5→L (8%), H-5→L+1 (2%), H→L+2<br>(5%) |
| 6        | 307.44<br>7                      | 4.033        | 0.007           | H-5→L (64%), H-5→L+1 (17%), H-3→L (13%),                                                       |

**Table S14:** UV-Visible analysis of compound 6.

| <b>N</b> | <b>DFT</b>                       | <b>E(eV)</b> | <b><i>f</i></b> | <b>MO contributions</b>                  |
|----------|----------------------------------|--------------|-----------------|------------------------------------------|
| <b>O</b> | <b><math>\lambda</math> (nm)</b> |              |                 |                                          |
| 1        | 444.73<br>8                      | 2.788        | 0.034           | H→L (97%),                               |
| 2        | 393.93<br>8                      | 3.147        | 0.000           | H-1→L (86%), H-5→L (3%), H-1→L+1 (3%)    |
| 3        | 368.34<br>3                      | 3.366        | 0.015           | H→L+1 (98%),                             |
| 4        | 349.23<br>2                      | 3.550        | 0.022           | H→L+2 (98%),                             |
| 5        | 323.68<br>5                      | 3.830        | 0.000           | H-7→L (10%), H-7→L+1 (85%), H-7→L+6 (3%) |
| 6        | 315.41<br>7                      | 3.931        | 0.152           | H-2→L (90%), H-1→L (2%)                  |

**Table S15:** UV-Visible analysis of compound 7.

| <b>N</b> | <b>DFT</b>                       | <b>E(eV)</b> | <b><i>f</i></b> | <b>MO contributions</b>                   |
|----------|----------------------------------|--------------|-----------------|-------------------------------------------|
| <b>O</b> | <b><math>\lambda</math> (nm)</b> |              |                 |                                           |
| 1        | 443.70<br>4                      | 2.794        | 0.031           | H-1→L (10%), H→L (87%),                   |
| 2        | 420.12                           | 2.951        | 0.018           | H-2→L (11%), H-1→L (75%), H-3→L (4%), H→L |

|   |        |       |       |                                                             |
|---|--------|-------|-------|-------------------------------------------------------------|
|   | 9      |       |       | (8%)                                                        |
| 3 | 390.85 | 3.172 | 0.008 | H-3→L (23%), H-2→L (54%), H-1→L (13%), H-4→L (3%), H→L (4%) |
| 4 | 347.72 | 3.566 | 0.007 | H→L+1 (94%), H-1→L+1 (4%)                                   |
| 5 | 335.53 | 3.695 | 0.033 | H-1→L+1 (93%), H→L+1 (4%)                                   |
| 6 | 319.39 | 3.882 | 0.008 | H-3→L (69%), H-2→L (28%),                                   |
|   | 0      |       |       |                                                             |

**Table S16:** Calculated vibrational frequencies of **4**.

| <i><sup>a</sup>Freq</i> | <i><sup>a</sup>I<sub>IR</sub></i> | <i>EXP</i> | Vibrational assignments                                                               |
|-------------------------|-----------------------------------|------------|---------------------------------------------------------------------------------------|
| 3614                    | 66                                |            | $\nu(\text{N-H})$                                                                     |
| 3194                    | 20                                | 3214       | $\nu(\text{s}) \text{C-H}_{\text{Ben}}$                                               |
| 3185                    | 10                                |            | $\nu(\text{s}) + \nu(\text{as}) \text{C-H}_{\text{Ben}}$                              |
| 3186                    | 6                                 |            | $\nu(\text{as}) \text{C-H}_{\text{Ben}}$                                              |
| 2873                    | 162                               | 2894       | $\nu(\text{C-H-O})$                                                                   |
| 1778                    | 301                               |            | $\nu(\text{C-O})$                                                                     |
| 1664                    | 71                                | 1660       | $\nu(\text{C=C-C=C}_{\text{Ben}}) + \nu(\text{C-O})$                                  |
| 1585                    | 24                                |            | $\nu(\text{C=N-C=N}_{\text{pyr}}) + (\rho) \text{C-H}_{\text{pyr}} + \nu(\text{C-O})$ |
| 1544                    | 327                               | 1566       | $\nu(\text{C-O}) + \nu(\text{C-H})$                                                   |
| 1474                    | 86                                |            | $(\rho + \delta) \text{C-H}_{\text{Ben}} + (\rho) \text{C-H}_{\text{pyr}}$            |
| 1435                    | 359                               |            | $\nu(\text{C-N}) + (\rho) \text{C-H}_{\text{Ben}} + \nu(\text{C-C})$                  |
| 1357                    | 34                                |            | $(\rho) \text{C-H}_{\text{pyr}} + \gamma(\text{C-H}_{\text{Ben}})$                    |
| 1335                    | 24                                |            | $(\rho) \text{C-H}_{\text{Ben}}$                                                      |
| 1233                    | 61                                |            | $(\rho + \delta) \text{C-H}_{\text{Ben}}$                                             |
| 1197                    | 121                               |            | $(\rho + \delta) \text{C-H}_{\text{Ben}}$                                             |
| 1090                    | 14                                |            | $(\rho + \delta) \text{C-H}_{\text{Ben}} + (\delta) \text{C-H}_{\text{pyr}}$          |
| 944                     | 13                                |            | $\nu(\text{C=N-C=N}_{\text{pyr}}) + \gamma(\text{C-H}_{\text{pyr}})$                  |
| 892                     | 54                                | 843        | $(\rho) \text{C-H}_{\text{Ben}} + (\rho) (\text{N-H}) + \gamma(\text{C-H-O})$         |
| 771                     | 38                                |            | $(w) \text{C-H}_{\text{Ben}}$                                                         |
| 619                     | 16                                |            | $(w) \text{C-H}_{\text{Ben}} + (\rho) \text{C-H}_{\text{Ben}}$                        |

**Table S17:** Calculated vibrational frequencies of **5**.

| <i><sup>a</sup>Freq</i> | <i><sup>a</sup>I<sub>IR</sub></i> | <i>EXP</i> | Vibrational assignments                                                                 |
|-------------------------|-----------------------------------|------------|-----------------------------------------------------------------------------------------|
| 3614                    | 64                                |            | $\nu(\text{N-H})$                                                                       |
| 3193                    | 20                                | 3193       | $\nu(\text{s}) \text{C-H}_{\text{Ben}}$                                                 |
| 3172                    | 6                                 |            | $\nu(\text{s}) + \nu(\text{as}) \text{C-H}_{\text{Ben}}$                                |
| 3160                    | 3                                 |            | $\nu(\text{as}) \text{C-H}_{\text{Ben}}$                                                |
| 1763                    | 191                               |            | $\nu(\text{C-O})$                                                                       |
| 1664                    | 69                                | 1661       | $\nu(\text{C=C-C=C}_{\text{Ben}}) + \nu(\text{C-O}) + \nu(\text{C=N-C=N}_{\text{pyr}})$ |
| 1632                    | 107                               |            | $\nu(\text{C=C-C=C}_{\text{Ben}}) + \nu(\text{C-O}) + \nu(\text{C=N-C=N}_{\text{pyr}})$ |
| 1543                    | 321                               |            | $(\rho)(\text{N-H}) + \nu(\text{C=N-C=N}_{\text{pyr}})$                                 |

|      |     |     |                                                                                  |
|------|-----|-----|----------------------------------------------------------------------------------|
| 1435 | 335 |     | ( $\delta$ ) (C-H <sub>pyr</sub> ) + ( $\rho$ ) C-H <sub>Ben</sub> + $\nu$ (C-C) |
| 1372 | 51  |     | ( $\delta$ ) (C-H <sub>pyr</sub> ) + ( $\rho$ ) C-H <sub>Ben</sub>               |
| 1269 | 46  |     | ( $\delta$ ) (C-H <sub>pyr</sub> ) + ( $\rho$ ) C-H <sub>Pry</sub>               |
| 1197 | 122 |     | ( $\rho + \delta$ ) C-H <sub>Ben</sub> + $\gamma$ (C-H <sub>Ben</sub> )          |
| 1143 | 52  |     | ( $\rho + \delta$ ) C-H <sub>Ben</sub>                                           |
| 1030 | 41  |     | $\nu$ (C=C-C=C <sub>Ben</sub> ) + ( $\rho$ ) C-H <sub>Ben</sub>                  |
| 943  | 11  | 958 | ( $\tau + \delta$ ) C-H <sub>Ben</sub>                                           |
| 892  | 51  |     | ( $\rho$ ) C-H <sub>Ben</sub> + ( $\rho$ ) C-H <sub>Pry</sub> + ( $\rho$ ) (N-H) |
| 770  | 23  | 759 | ( $w$ ) C-H <sub>Ben</sub> + $\nu$ (C-Cl)                                        |
| 690  | 23  |     | ( $\gamma$ ) C-H <sub>Ben</sub>                                                  |

**Table S18:** Calculated vibrational frequencies of 6.

| <i><sup>a</sup>Freq</i> | <i><sup>a</sup>I<sub>IR</sub></i> | <i>EXP</i> | Vibrational assignments                                                                                                 |
|-------------------------|-----------------------------------|------------|-------------------------------------------------------------------------------------------------------------------------|
| 3613                    | 66                                |            | $\nu$ (N-H)                                                                                                             |
| 3224                    | 2                                 | 3347       | $\nu$ (s) C-H <sub>Ben</sub>                                                                                            |
| 3180                    | 39                                |            | $\nu$ (as) C-H <sub>Ben</sub>                                                                                           |
| 3174                    | 5                                 |            | $\nu$ (s) + $\nu$ (as) C-H <sub>Ben</sub>                                                                               |
| 3032                    | 7                                 |            | $\nu$ (C-H <sub>Pry</sub> )                                                                                             |
| 1762                    | 190                               |            | $\nu$ (C-O)                                                                                                             |
| 1664                    | 70                                | 1659       | $\nu$ (C=C-C=C <sub>Ben</sub> ) + $\nu$ (C-O) + $\nu$ $\nu$ (C=N-C=N <sub>pyr</sub> ) + ( $\delta$ ) C-H <sub>Ben</sub> |
| 1652                    | 68                                | 1565       | $\nu$ (C=C-C=C <sub>Ben</sub> ) + $\nu$ (C-O) + $\nu$ (N-O <sub>NO2</sub> )                                             |
| 1544                    | 313                               |            | ( $\rho$ )(N-H) + $\nu$ (C=N-C=N <sub>pyr</sub> ) + ( $\delta$ ) C-H <sub>Ben</sub>                                     |
| 1435                    | 351                               |            | ( $\delta$ ) (C-H <sub>pyr</sub> ) + ( $\rho$ ) C-H <sub>Ben</sub> + ( $\delta$ ) C-H <sub>Ben</sub> + $\nu$ (C-C)      |
| 1378                    | 389                               | 1338       | ( $\delta$ ) (C-H <sub>pyr</sub> ) + ( $\rho$ ) C-H <sub>Ben</sub> + $\nu$ (N-O <sub>NO2</sub> )                        |
| 1271                    | 66                                |            | ( $\delta$ ) (C-H <sub>pyr</sub> ) + ( $\rho$ ) C-H <sub>Pry</sub>                                                      |
| 1197                    | 118                               |            | ( $\rho + \delta$ ) C-H <sub>Ben</sub> + $\gamma$ (C-H <sub>Ben</sub> )                                                 |
| 1143                    | 54                                |            | ( $\rho + \delta$ ) C-H <sub>Ben</sub>                                                                                  |
| 1090                    | 14                                |            | $\nu$ (C=C-C=C <sub>Ben</sub> ) + ( $\rho$ ) C-H <sub>Ben</sub> + ( $\delta$ ) (C-H <sub>pyr</sub> )                    |
| 945                     | 17                                | 958        | ( $\tau + \delta$ ) C-H <sub>Ben</sub>                                                                                  |
| 892                     | 52                                | 895        | ( $\rho$ ) C-H <sub>Ben</sub> + ( $\rho$ ) C-H <sub>Pry</sub> + ( $\rho$ ) (N-H)                                        |
| 771                     | 25                                | 765        | ( $w$ ) C-H <sub>Ben</sub> + $\nu$ (N-O <sub>NO2</sub> )                                                                |
| 684                     | 6                                 |            | ( $\rho$ ) C-H <sub>Pry</sub> + ( $\rho$ ) (N-O <sub>NO2</sub> )                                                        |

**Table S19:** Calculated vibrational frequencies of 7.

| <i><sup>a</sup>Freq</i> | <i><sup>a</sup>I<sub>IR</sub></i> | <i>EXP</i> | Vibrational assignments                   |
|-------------------------|-----------------------------------|------------|-------------------------------------------|
| 3615                    | 62                                |            | $\nu$ (N-H)                               |
| 3202                    | 12                                | 3459       | $\nu$ (s) C-H <sub>Ben</sub>              |
| 3192                    | 22                                |            | $\nu$ (s) C-H <sub>Ben</sub>              |
| 3183                    | 11                                |            | $\nu$ (s) + $\nu$ (as) C-H <sub>Ben</sub> |
| 3177                    | 46                                |            | $\nu$ (as) C-H <sub>pyr</sub>             |
| 3130                    | 28                                |            | $\nu$ (s) OCH <sub>CH3</sub>              |

|      |     |      |                                                                       |
|------|-----|------|-----------------------------------------------------------------------|
| 2998 | 65  |      | $\nu(s)$ OCH <sub>CH3</sub>                                           |
| 1771 | 207 |      | $\nu(C-O)$                                                            |
| 1665 | 67  | 1658 | $\nu(C=C-C=C_{Ben}) + \nu(C-O) + \nu(C=N-C=N_{pyr})$                  |
| 1632 | 114 |      | $\nu(C=C-C=C_{Ben}) + (\rho + \delta) C-H_{Ben} + \nu(C=N-C=N_{pyr})$ |
| 1544 | 304 |      | $(\rho)(N-H) + \nu(C=N-C=N_{pyr})$                                    |
| 1433 | 354 |      | $(\delta)(C-H_{pyr}) + (\rho) C-H_{Ben} + \nu(C-C)$                   |
| 1378 | 58  |      | $(\delta)(C-H_{pyr}) + (\rho) C-H_{Ben}$                              |
| 1275 | 128 | 1270 | $(\delta)(C-H_{pyr}) + (\rho) C-H_{Pry}$                              |
| 1194 | 115 | 1187 | $(\rho + \delta) C-H_{Ben} + \gamma(C-H_{Ben})$                       |
| 1140 | 60  |      | $(\rho + \delta) C-H_{Ben}$                                           |
| 1064 | 60  |      | $\nu(C=C-C=C_{Ben}) + \nu(OCH_{CH3})$                                 |
| 999  | 4   |      | $(\tau + \delta) C-H_{Ben}$                                           |
| 892  | 53  |      | $(\rho) C-H_{Ben} + (\rho) C-H_{Pry} + (\rho)(N-H)$                   |
| 772  | 28  | 720  | $(w) C-H_{Ben} + \nu(OCH3)$                                           |
| 619  | 16  |      | $(\gamma) C-H_{Ben}$                                                  |

Frequencies are given in  $cm^{-1}$ ,  $\nu$  =stretching,  $\beta$ =in-plane bending,  $\gamma$ =out-plane bending,  $\delta$ =scissoring,  $\rho$ =rocking,  $w$ = wagging,  $s$  =symmetric,  $as$ =asymmetric,  $\tau$ =twisting, Ben=benzene ring, pyr = pyrazone structure, pry= pyridine, EXP= Experimental values.

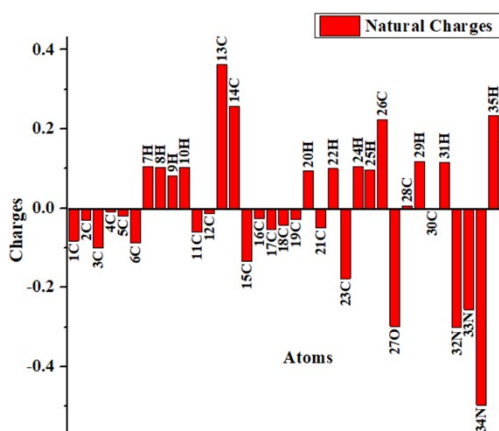

4

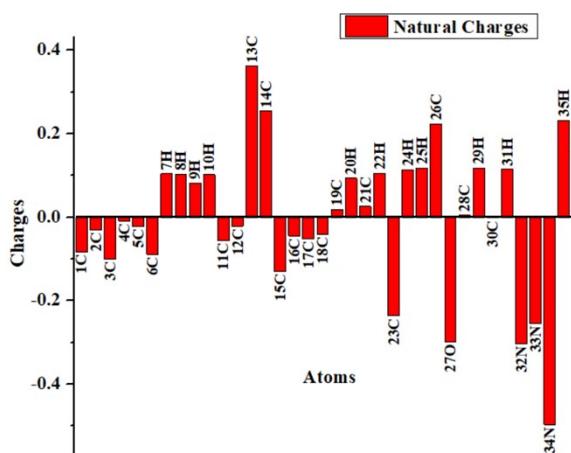

5

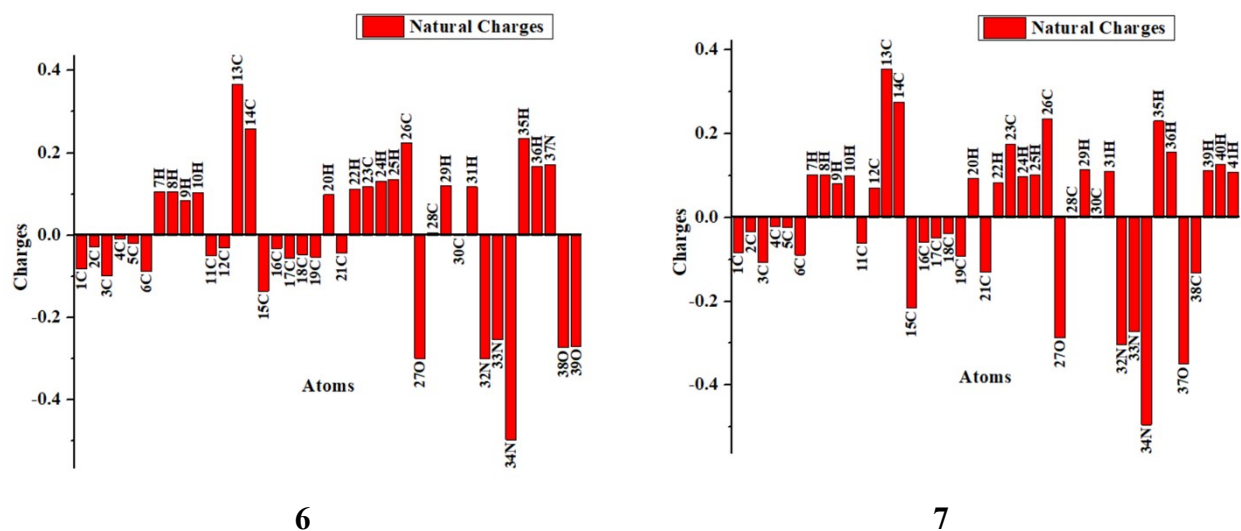

Figure S4: NPA graphs of 4-7 compounds.

Table 20: Computed average polarizability  $\langle\alpha\rangle$  dipole moment ( $\mu_{tot}$ ), first hyperpolarizability ( $\beta_{tot}$ ) and second hyperpolarizability ( $\gamma_{tot}$ ) of compounds 4-7.

| Compounds | $\mu_{tot}$ | $\langle\alpha\rangle\times 10^{-23}$ | $\beta_{tot}\times 10^{-30}$ | $\langle\gamma\rangle\times 10^{-35}$ |
|-----------|-------------|---------------------------------------|------------------------------|---------------------------------------|
| 4         | 5.9373      | 3.87                                  | 7.88                         | 5.82                                  |
| 5         | 5.8622      | 3.78                                  | 9.74                         | 5.27                                  |
| 6         | 8.5041      | 3.86                                  | 9.20                         | 6.13                                  |
| 7         | 3.2695      | 3.90                                  | 15.6                         | 6.63                                  |

$\mu_{tot}$  in Debye (D);  $\langle\alpha\rangle$ ,  $\beta_{tot}$ , and  $\langle\gamma\rangle$  are in *esu*.

Table S21: Dipole polarizability and major contributing tensor (*e.s.u.*) of the studied comp. 4-7.

| Dipole Moment  | 4                     | 5                     | 6                     | 7                     |
|----------------|-----------------------|-----------------------|-----------------------|-----------------------|
|                | $\mu_x$               | -4.9478               | -4.3304               | -7.3535               |
| $\mu_y$        | 3.2213                | 3.2439                | 3.9722                | 2.3415                |
| $\mu_z$        | -0.6282               | -2.2563               | -1.5704               | -2.1097               |
| $\mu_{total}$  | 5.9373                | 5.8622                | 8.5041                | 3.2695                |
| Polarizability |                       |                       |                       |                       |
| $\alpha_{xx}$  | $4.51\times 10^{-23}$ | $4.40\times 10^{-23}$ | $4.39\times 10^{-23}$ | $4.88\times 10^{-23}$ |
| $\alpha_{yy}$  | $4.29\times 10^{-23}$ | $4.30\times 10^{-23}$ | $4.42\times 10^{-23}$ | $4.12\times 10^{-23}$ |

|                                  |                        |                        |                        |                        |
|----------------------------------|------------------------|------------------------|------------------------|------------------------|
| $\alpha_{zz}$                    | $2.81 \times 10^{-23}$ | $2.65 \times 10^{-23}$ | $2.77 \times 10^{-23}$ | $2.72 \times 10^{-23}$ |
| $\alpha_{total}$                 | $3.87 \times 10^{-23}$ | $3.78 \times 10^{-23}$ | $3.86 \times 10^{-23}$ | $3.90 \times 10^{-23}$ |
| <b>2<sup>nd</sup> Hyper pol.</b> |                        |                        |                        |                        |
|                                  |                        |                        |                        |                        |
| $\gamma_X$                       | $3.67 \times 10^{-35}$ | $3.11 \times 10^{-35}$ | $3.82 \times 10^{-35}$ | $4.30 \times 10^{-35}$ |
| $\gamma_Y$                       | $1.91 \times 10^{-35}$ | $1.95 \times 10^{-35}$ | $2.09 \times 10^{-35}$ | $2.11 \times 10^{-35}$ |
| $\gamma_Z$                       | $0.23 \times 10^{-35}$ | $0.21 \times 10^{-35}$ | $0.22 \times 10^{-35}$ | $0.21 \times 10^{-35}$ |
| Average $\langle \gamma \rangle$ | $5.82 \times 10^{-35}$ | $5.27 \times 10^{-35}$ | $6.13 \times 10^{-35}$ | $6.63 \times 10^{-35}$ |
| Magnitude of $\gamma$            | $4.15 \times 10^{-35}$ | $3.68 \times 10^{-35}$ | $4.36 \times 10^{-35}$ | $4.80 \times 10^{-35}$ |

**Table S22:** Frequency dependent Second hyperpolarizability (*e.s.u.*) of studied compounds 4-7.

| Parameters                            | Frequency $\omega$ | 4                      | 5                      | 6                      | 7                      |
|---------------------------------------|--------------------|------------------------|------------------------|------------------------|------------------------|
| $\gamma(-\omega, \omega, 0, 0)$       | 0.000              | $5.82 \times 10^{-35}$ | $5.27 \times 10^{-35}$ | $6.13 \times 10^{-35}$ | $6.63 \times 10^{-35}$ |
|                                       | 1907.21nm          | $6.19 \times 10^{-35}$ | $5.61 \times 10^{-35}$ | $6.56 \times 10^{-35}$ | $7.17 \times 10^{-35}$ |
| $\gamma(-2\omega, \omega, \omega, 0)$ | 0.000              | $5.82 \times 10^{-35}$ | $5.27 \times 10^{-35}$ | $6.13 \times 10^{-35}$ | $6.63 \times 10^{-35}$ |
|                                       | 1907.21nm          | $7.07 \times 10^{-35}$ | $6.43 \times 10^{-35}$ | $7.61 \times 10^{-35}$ | $8.54 \times 10^{-35}$ |

**Table S23:** The computed first hyperpolarizability ( $\beta_{tot}$ ) and major contributing tensors (*e.s.u.*) of compounds 4-7.

| Polarizability  | 4                       | 5                       | 6                       | 7                       |
|-----------------|-------------------------|-------------------------|-------------------------|-------------------------|
| $\beta_{xxx}$   | $-3.18 \times 10^{-30}$ | $4.46 \times 10^{-30}$  | $-7.80 \times 10^{-30}$ | $9.29 \times 10^{-30}$  |
| $\beta_{xxy}$   | $3.19 \times 10^{-30}$  | $-0.59 \times 10^{-30}$ | $2.31 \times 10^{-30}$  | $-1.15 \times 10^{-30}$ |
| $\beta_{xyy}$   | $2.26 \times 10^{-30}$  | $4.10 \times 10^{-30}$  | $2.00 \times 10^{-30}$  | $5.27 \times 10^{-30}$  |
| $\beta_{yyy}$   | $4.40 \times 10^{-30}$  | $3.63 \times 10^{-30}$  | $5.07 \times 10^{-30}$  | $2.66 \times 10^{-30}$  |
| $\beta_{xxz}$   | $0.59 \times 10^{-30}$  | $-0.54 \times 10^{-30}$ | $1.70 \times 10^{-30}$  | $-1.56 \times 10^{-30}$ |
| $\beta_{yyz}$   | $-0.13 \times 10^{-30}$ | $-1.82 \times 10^{-30}$ | $-1.44 \times 10^{-30}$ | $-2.04 \times 10^{-30}$ |
| $\beta_{xzz}$   | $0.15 \times 10^{-30}$  | $0.43 \times 10^{-30}$  | $0.32 \times 10^{-30}$  | $0.49 \times 10^{-30}$  |
| $\beta_{yzz}$   | $0.18 \times 10^{-30}$  | $-0.13 \times 10^{-30}$ | $0.003 \times 10^{-30}$ | $0.31 \times 10^{-30}$  |
| $\beta_{zzz}$   | $-0.27 \times 10^{-31}$ | $0.04 \times 10^{-30}$  | $-0.09 \times 10^{-30}$ | $-0.04 \times 10^{-30}$ |
| $\beta_{total}$ | $7.88 \times 10^{-30}$  | $9.74 \times 10^{-30}$  | $9.20 \times 10^{-30}$  | $15.6 \times 10^{-30}$  |

**Table S24:** Frequency dependent First hyperpolarizability (*e.s.u.*) of studied compound 4-7.

|        | Parameters                          | Frequency $\omega$ | 4                      | 5                      | 6                      | 7                      |
|--------|-------------------------------------|--------------------|------------------------|------------------------|------------------------|------------------------|
| Static | $\beta(-\omega; \omega, 0, 0)$      | 0.000              | $7.88 \times 10^{-30}$ | $9.74 \times 10^{-30}$ | $9.20 \times 10^{-30}$ | $15.6 \times 10^{-30}$ |
|        | $\beta(-2, \omega; \omega, \omega)$ | 0.000              | $7.88 \times 10^{-30}$ | $9.74 \times 10^{-30}$ | $9.20 \times 10^{-30}$ | $15.6 \times 10^{-30}$ |

|                 |                                 |           |                        |                        |                        |                        |
|-----------------|---------------------------------|-----------|------------------------|------------------------|------------------------|------------------------|
| <b>Specific</b> | $\beta(-\omega;\omega,0)$       | 1907.21nm | $3.89 \times 10^{-23}$ | $3.81 \times 10^{-23}$ | $3.89 \times 10^{-23}$ | $3.93 \times 10^{-23}$ |
|                 | $\beta(-2\omega;\omega,\omega)$ | 1907.21nm | $3.89 \times 10^{-23}$ | $3.81 \times 10^{-23}$ | $3.89 \times 10^{-23}$ | $3.93 \times 10^{-23}$ |

**Table S25:** *In Vitro* Antioxidant Activity of synthesized compounds (4-7)

| <b>Compound</b>      | <b>Conc. (<math>\mu\text{g/ml}</math>)</b> |                  |                  |                  | <b>IC<sub>50</sub> (<math>\mu\text{M}</math>)</b> |
|----------------------|--------------------------------------------|------------------|------------------|------------------|---------------------------------------------------|
|                      | <b>50</b>                                  | <b>75</b>        | <b>100</b>       | <b>125</b>       |                                                   |
| <b>4</b>             | 15.73 $\pm$ 0.84                           | 37.81 $\pm$ 0.61 | 48.24 $\pm$ 1.21 | 68.43 $\pm$ 1.17 | 5.98 $\pm$ 1.95                                   |
| <b>5</b>             | 16.92 $\pm$ 0.99                           | 34.81 $\pm$ 1.23 | 63.12 $\pm$ 1.53 | 71.72 $\pm$ 0.88 | 5.92 $\pm$ 0.11                                   |
| <b>6</b>             | 6.13 $\pm$ 0.54                            | 22.71 $\pm$ 0.61 | 35.14 $\pm$ 1.21 | 61.43 $\pm$ 1.17 | 6.98 $\pm$ 0.95                                   |
| <b>7</b>             | 6.96 $\pm$ 0.99                            | 19.87 $\pm$ 2.02 | 48.86 $\pm$ 1.12 | 69.43 $\pm$ 2.00 | 7.76 $\pm$ 1.76                                   |
| <b>Ascorbic acid</b> | 17.34 $\pm$ 1.13                           | 38.60 $\pm$ 0.12 | 69.15 $\pm$ 1.17 | 74.34 $\pm$ 1.08 | 5.31 $\pm$ 1.22                                   |

**Table S26:** Urease Inhibitory Activity of synthesized compounds (4-7)

| <b>Compounds</b> | <b>IC<sub>50</sub> (<math>\mu\text{M}</math>)</b> |
|------------------|---------------------------------------------------|
| <b>4</b>         | 6.79 $\pm$ 0.92                                   |
| <b>5</b>         | 4.12 $\pm$ 1.18                                   |
| <b>6</b>         | 4.77 $\pm$ 0.92                                   |
| <b>7</b>         | 11.91 $\pm$ 0.34                                  |
| <b>Thiourea</b>  | 1.94 $\pm$ 0.36                                   |

### Characterization By NMR & FTIR

4-(10-oxo-10,11-dihydro-5H-indeno[2',1':5,6]pyrido[2,3-b]pyrazin-11-yl)benzaldehyde (4).

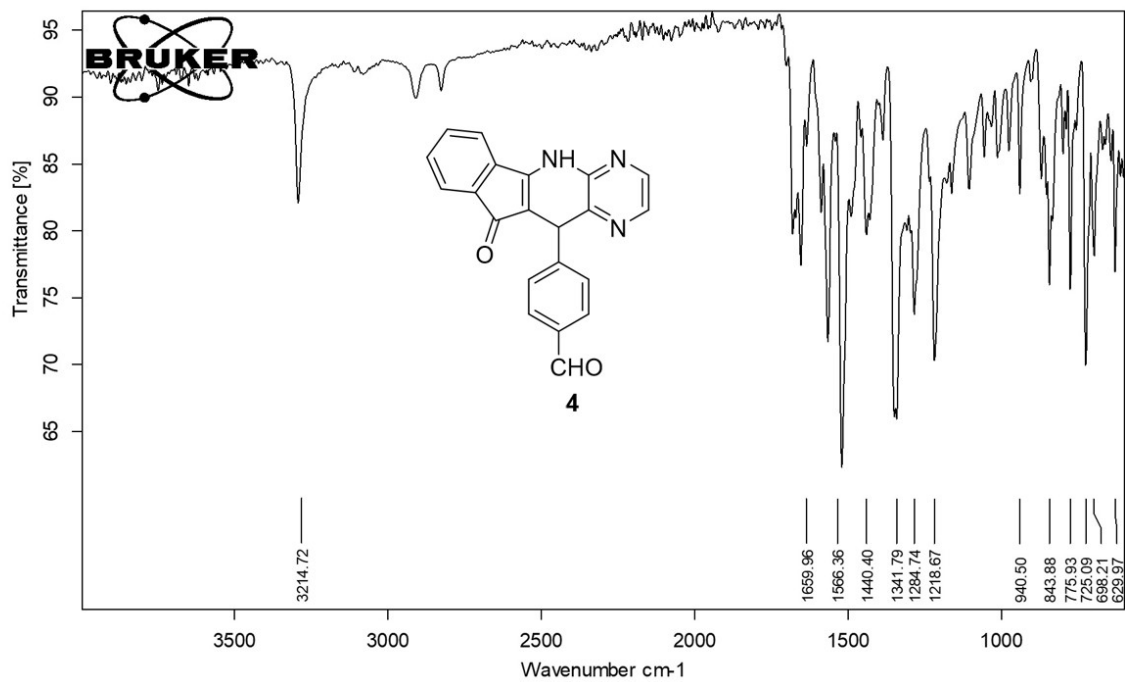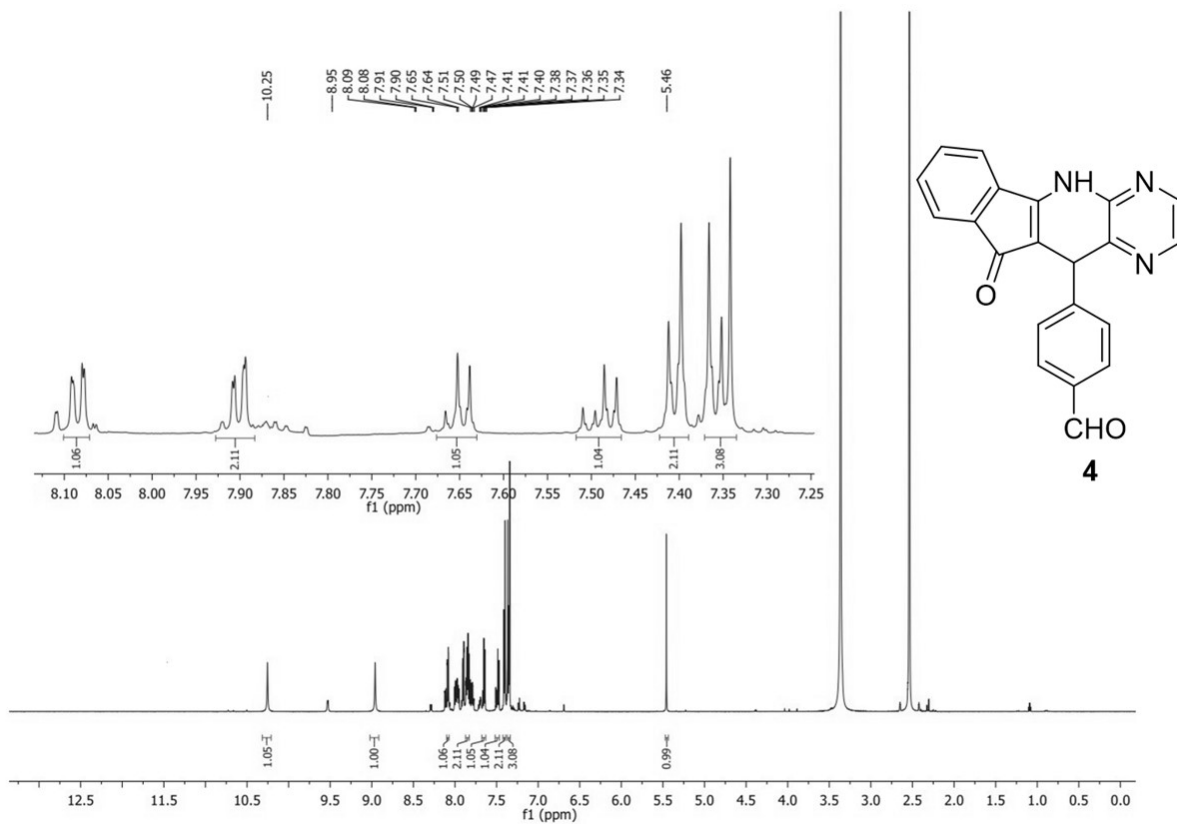



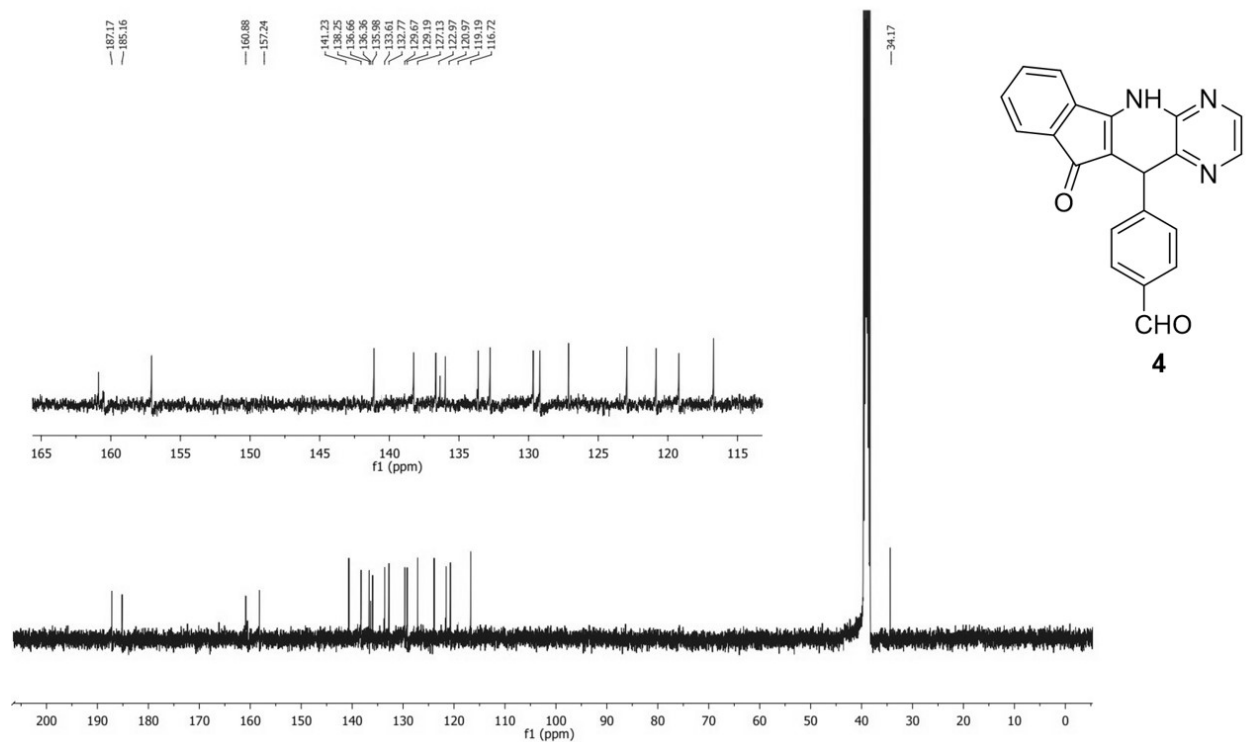

**11-(4-chlorophenyl)-5,11-dihydro-10H-indeno[2',1':5,6]pyrido[2,3-b]pyrazin-10-one(5).**

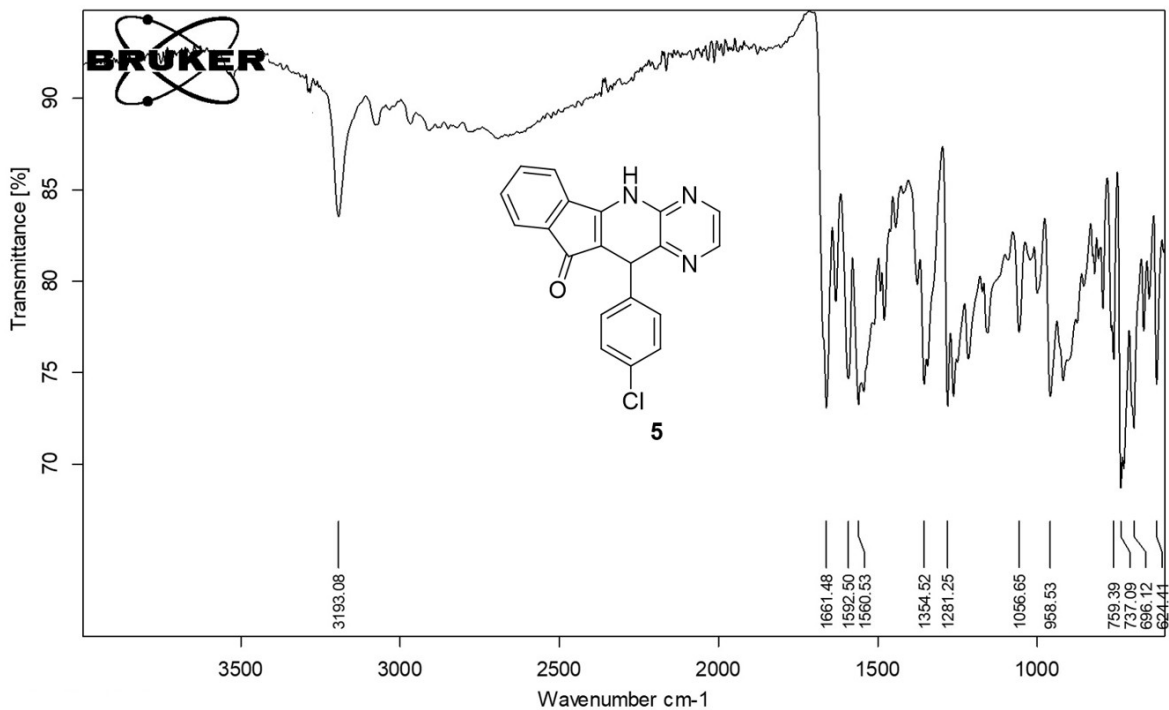

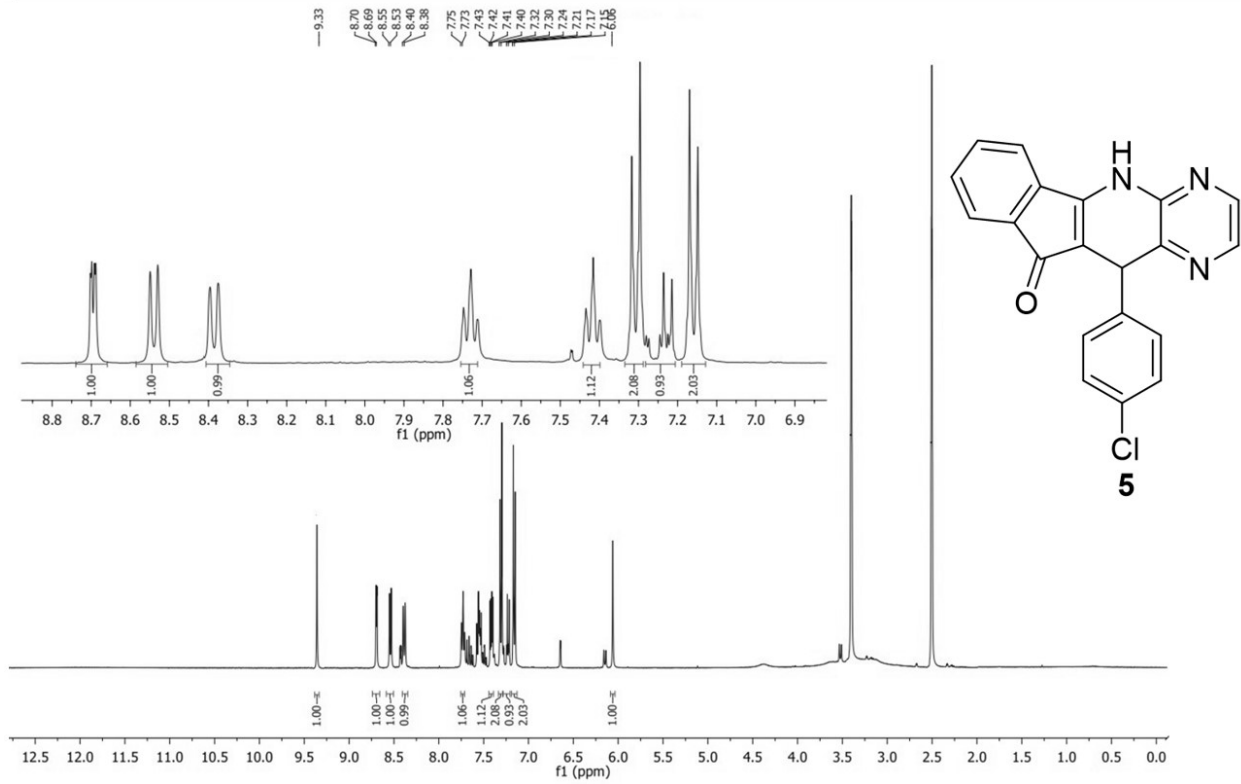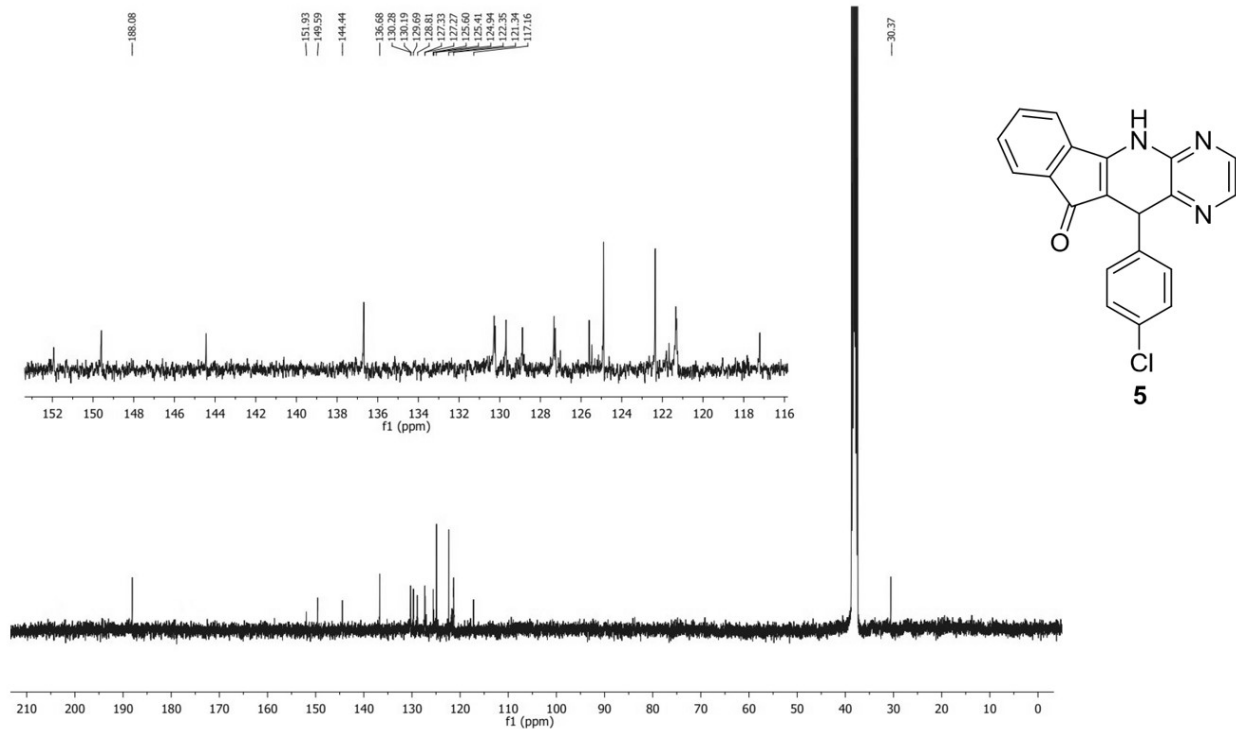



11-(4-nitrophenyl)-5,11-dihydro-10H-indeno[2',1':5,6]pyrido[2,3-b]pyrazin-10-one(6).

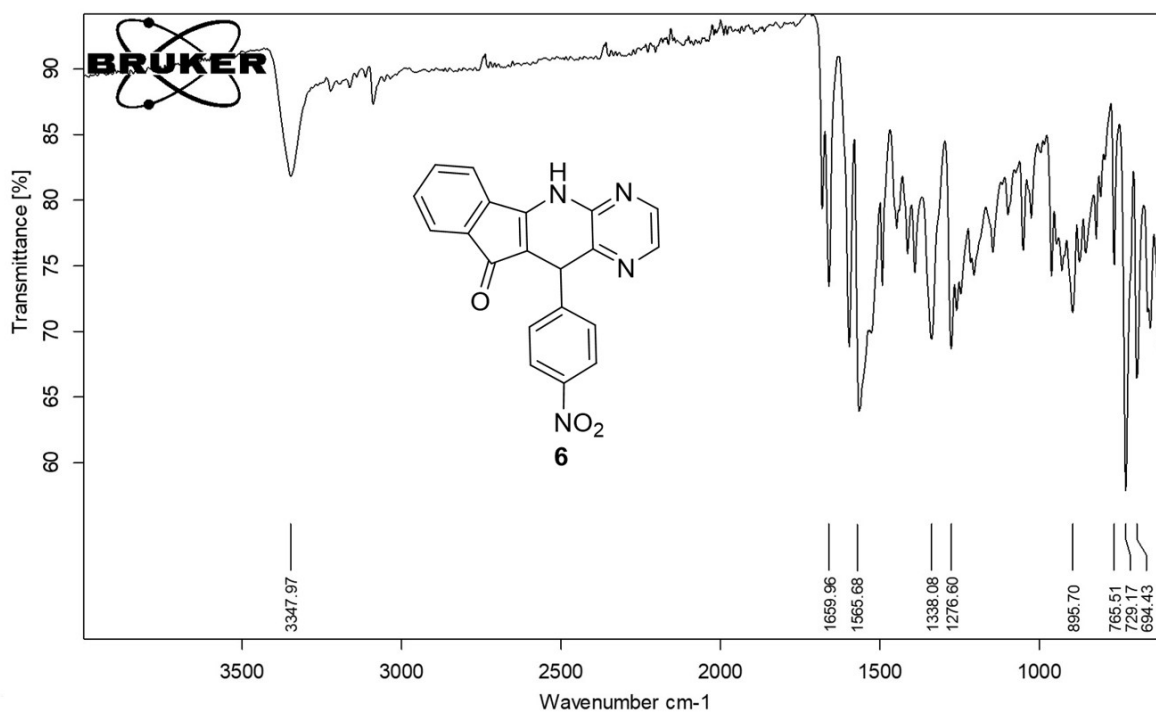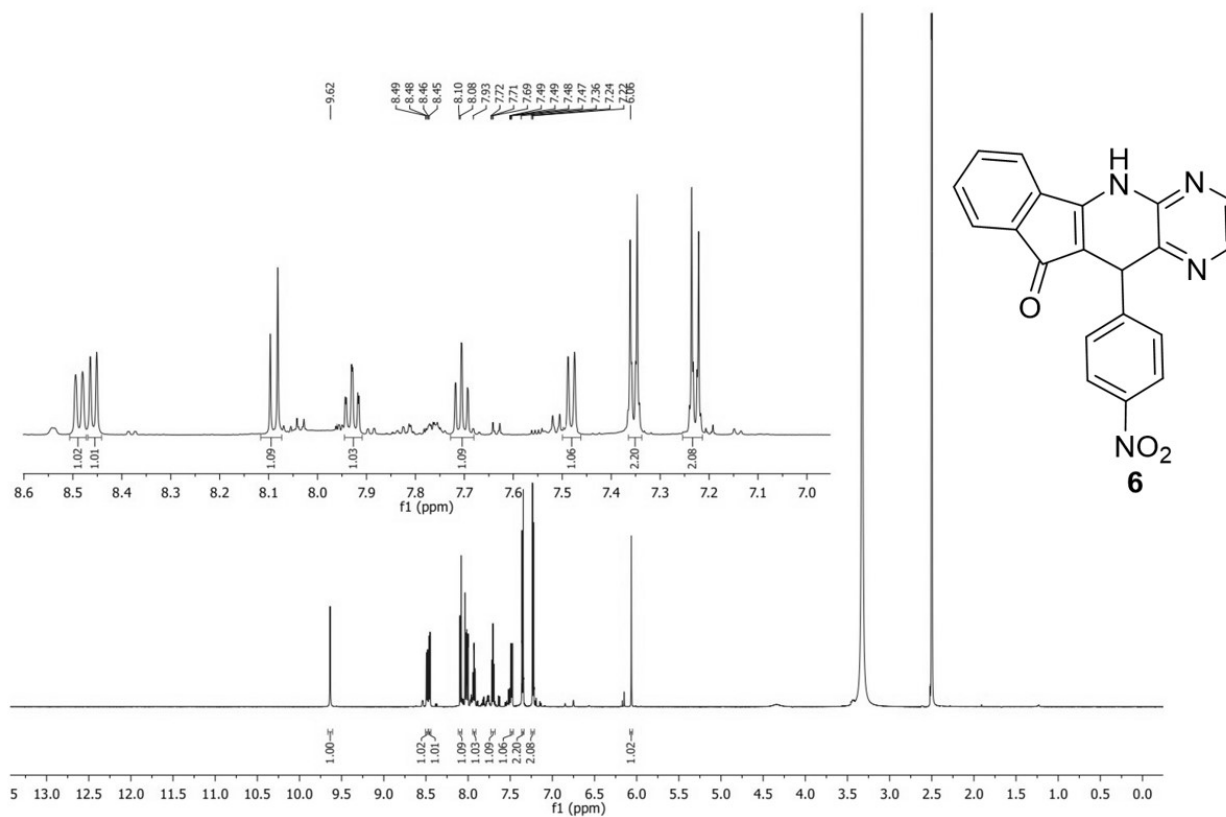

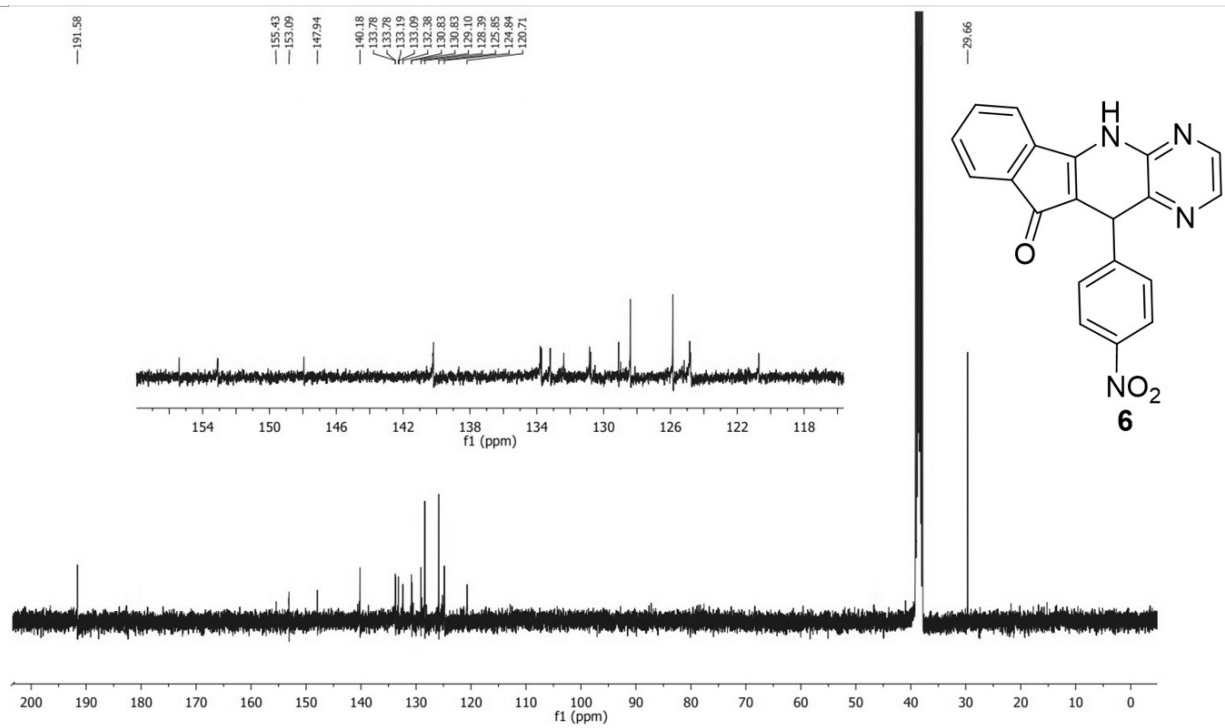

11-(4-methoxyphenyl)-5,11-dihydro-10H-indeno[2',1':5,6]pyrido[2,3-b]pyrazin-10-one(7).

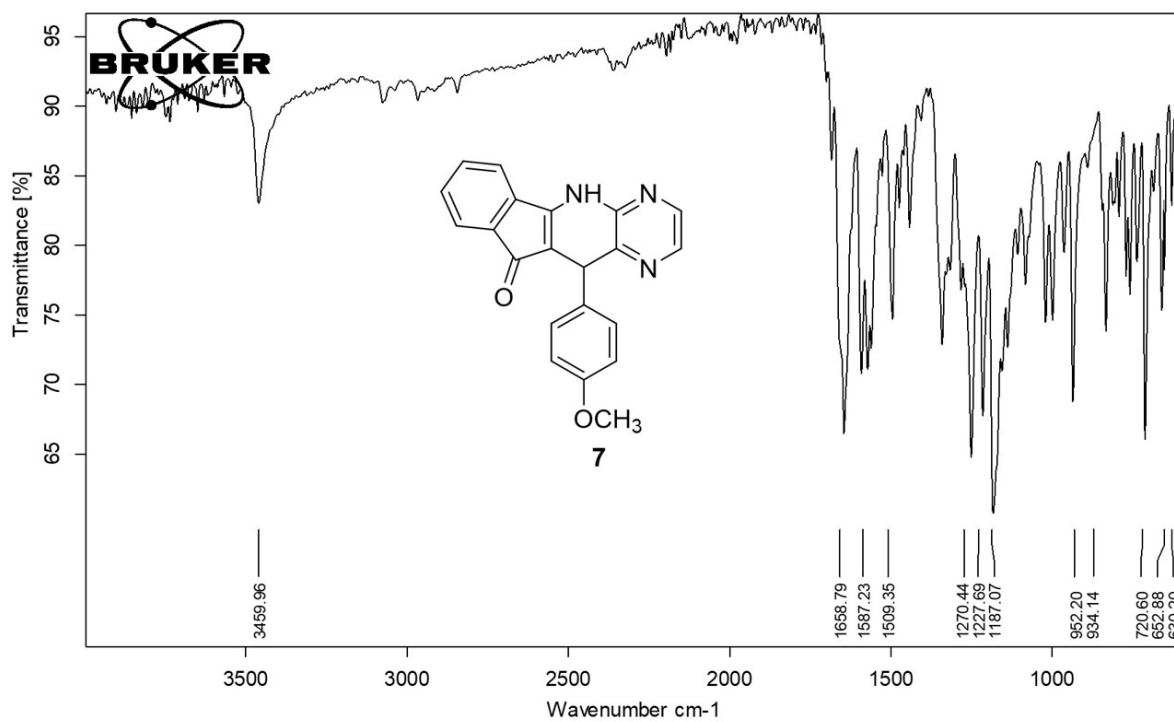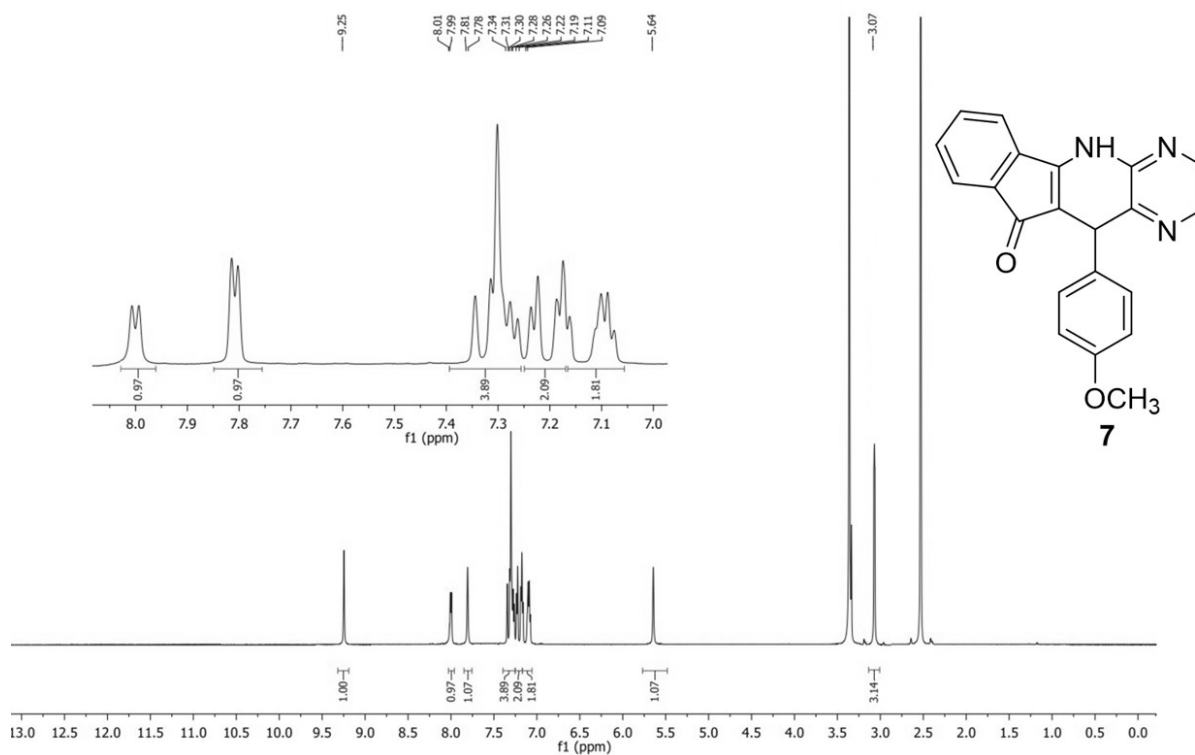

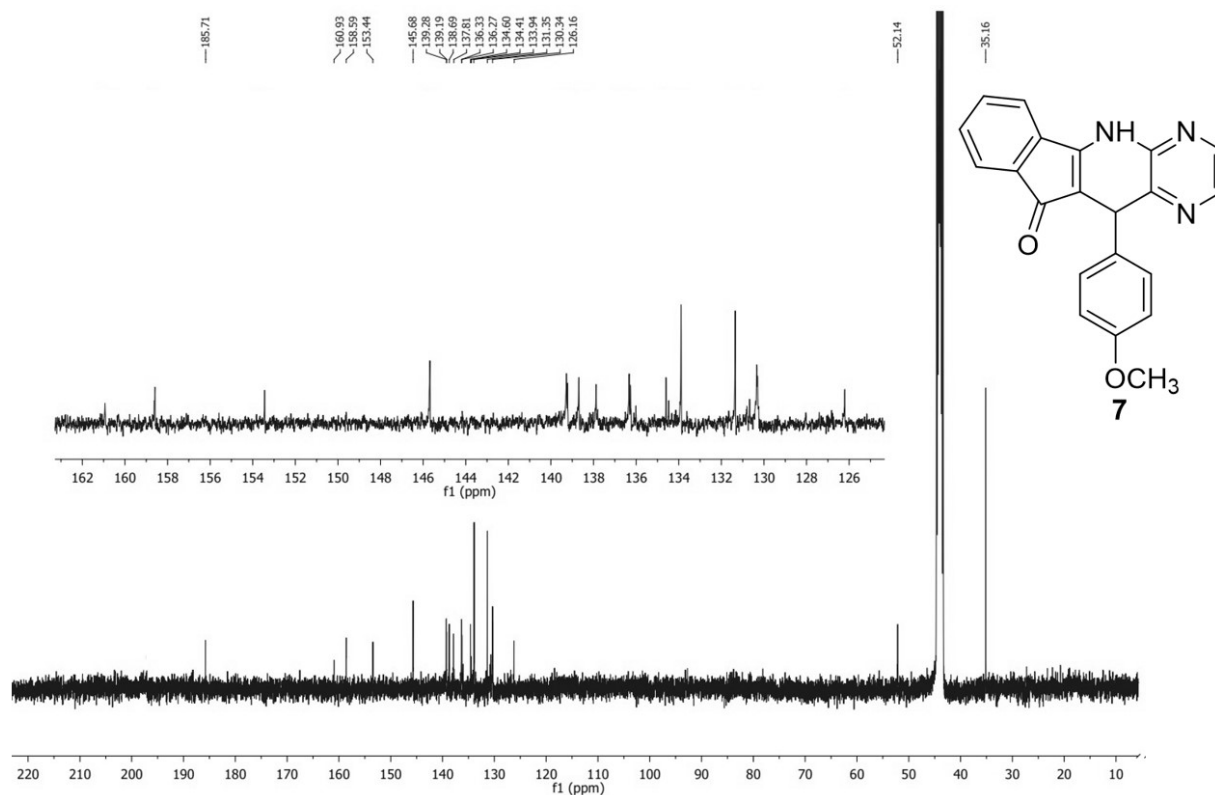

## 2.5.2 Characterization

### 4-(10-oxo-10,11-dihydro-5H-indeno[2',1':5,6]pyrido[2,3-b]pyrazin-11-yl)benzaldehyde (4).

Yellow solid, yield: 82%, mp 180°C; IR (KBr,  $\text{cm}^{-1}$ ): 3214 (N-H), 2894, 2812(CHO-H), 1659.96(CHO), 1566.36(CO), 843.88, 725.09;  $^1\text{H-NMR}$  (DMSO- $d_6$ , 400 MHz):  $\delta$  = 5.46 (s, 1H, Non-Aromatic-H), 7.37-7.34 (m, 3H, Indanone C<sub>20,21,22</sub>-H), 7.40 (d, 2H, Aryl C<sub>12,16</sub>-H, J=6.4 Hz), 7.51-7.47 (m, 1H, Indanone C<sub>23</sub>-H), 7.65 (d, 1H, Pyrazine C<sub>4</sub>-H, J=8.1 Hz), 7.90 (d, 2H, Aryl C<sub>13,15</sub>-H, J=6.4 Hz), 8.08 (d, 1H, Pyrazine C<sub>5</sub>-H, J=8.1 Hz), 10.25 (s, 1H, -CHO), 8.95 (s, N-H);  $^{13}\text{C-NMR}$  (DMSO- $d_6$ , 100 MHz):  $\delta$  = 34.17 (Nonaromatic-C), 116.72, 119.19, 120.97, 122.97, 129.19, 127.13, 129.67, 132.77, 133.61, 135.98, 136.36, 136.66, 138.25, 141.23, 157.24, 160.88, 185.16 (C=O), 187.17 (CHO); Elemental analysis calculated for C<sub>21</sub>H<sub>13</sub>N<sub>3</sub>O<sub>2</sub> (%): C, (74.33); H, (3.86); N, (12.38); observed (%): C, (74.29); H, (3.83); N, (12.35).

### 11-(4-chlorophenyl)-5,11-dihydro-10H-indeno[2',1':5,6]pyrido[2,3-b]pyrazin-10-one(5).

Yellowish green solid, yield: 82%, mp 168°C; IR (KBr,  $\text{cm}^{-1}$ ): 3193.08 (N-H), 1661.48 (CO), 958.53, 759.39 (C-Cl);  $^1\text{H-NMR}$  (DMSO- $d_6$ , 400 MHz):  $\delta$  = 6.06 (s, 1H, Non-Aromatic-H), 7.16 (d, 2H, Aryl C<sub>13,15</sub>-H, J=6.4 Hz), 7.23 (d, 1H, Indanone C<sub>20</sub>-H), 7.31 (d, 2H, Aryl C<sub>12,16</sub>-H, J=6.4

Hz), 7.42 (t, 1H, Indanone C<sub>21</sub>-H), 7.73 (t, 1H, Indanone C<sub>22</sub>-H), 8.39 (d, 1H, Indanone C<sub>23</sub>-H), 8.54 (d, 1H, Pyrazine C<sub>4</sub>-H, J=8.1 Hz), 8.70 (d, 1H, Pyrazine C<sub>5</sub>-H, J=8.1 Hz), 9.33 (s, N-H); <sup>13</sup>C-NMR (DMSO-*d*<sub>6</sub>, 100 MHz):  $\delta$  = 30.37 (Nonaromatic-C), 117.16, 121.34, 122.35, 124.94, 125.41, 125.60, 127.27, 127.33, 128.81, 129.69, 130.19, 130.28, 130.68, 144.44, 149.59, 151.93, 188.08 (C=O); Elemental analysis calculated for C<sub>21</sub>H<sub>13</sub>N<sub>3</sub>O<sub>2</sub> (%): C, (69.47); H, (3.50); N, (12.15); observed (%): C, (69.36); H, (3.46); N, (12.11).

**11-(4-nitrophenyl)-5,11-dihydro-10H-indeno[2',1':5,6]pyrido[2,3-b]pyrazin-10-one(6).** Dirty green solid, yield: 85%, mp 185°C; IR (KBr, cm<sup>-1</sup>): 3347.97 (N-H), 1659.96(CO), 1565.68(NO<sub>2</sub>), 1338.08(NO<sub>2</sub>), 895.75, 765.51; <sup>1</sup>H-NMR (DMSO-*d*<sub>6</sub>, 400 MHz):  $\delta$  = 6.06 (s, 1H, Non-Aromatic-H), 7.23 (d, 2H, Aryl C<sub>12,16</sub>-H, J=6.4 Hz), 7.35 (d, 2H, Aryl C<sub>13,15</sub>-H, J=6.4 Hz), 7.47 (d, 1H, Indanone C<sub>20</sub>-H), 7.71 (t, 1H, Indanone C<sub>21</sub>-H), 7.93 (t, 1H, Indanone C<sub>22</sub>-H), 8.09 (d, 1H, Indanone C<sub>23</sub>-H), 8.46 (d, 1H, Pyrazine C<sub>4</sub>-H, J=8.1 Hz), 8.48 (d, 1H, Pyrazine C<sub>5</sub>-H, J=8.1 Hz), 9.62 (s, N-H); <sup>13</sup>C-NMR (DMSO-*d*<sub>6</sub>, 100 MHz):  $\delta$  = 29.66 (Nonaromatic-C), 120.71, 124.84, 125.85, 128.39, 129.10, 130.82, 130.83, 132.38, 133.09, 133.19, 133.78, 133.79, 140.18, 147.94, 153.09, 155.43, 191.58 (C=O); Elemental analysis calculated for C<sub>21</sub>H<sub>13</sub>N<sub>3</sub>O<sub>2</sub> (%): C, (67.41); H, (3.39); N, (15.72); observed (%): C, (67.37); H, (3.34); N, (15.68).

**11-(4-methoxyphenyl)-5,11-dihydro-10H-indeno[2',1':5,6]pyrido[2,3-b]pyrazin-10-one(7).** Purple solid, yield: 89%, mp 178°C; IR (KBr, cm<sup>-1</sup>): 3459.96 (N-H), 1658.79 (CO), 1270.44 (O-CH<sub>3</sub>), 1187.07 (O-CH<sub>3</sub>), 720.60; <sup>1</sup>H-NMR (DMSO-*d*<sub>6</sub>, 400 MHz):  $\delta$  = 5.64 (s, 1H, Non-Aromatic-H), 3.07 (s, 3H, -OCH<sub>3</sub>), 7.10 (d, 2H, Aryl C<sub>13,15</sub>-H, J=6.4 Hz), 7.21 (d, 2H, Aryl C<sub>12,16</sub>-H, J=6.4 Hz), 7.32-7.29 (m, 4H, Indanone C<sub>20-23</sub>-H), 7.79 (d, 1H, Pyrazine C<sub>4</sub>-H, J=8.1 Hz), 8.0 (d, 1H, Pyrazine C<sub>5</sub>-H, J=8.1 Hz), 9.25 (s, N-H); <sup>13</sup>C-NMR (DMSO-*d*<sub>6</sub>, 100 MHz):  $\delta$  = 35.16 (Nonaromatic-C), 52.14 (O-CH<sub>3</sub>), 126.16, 130.34, 131.35, 133.94, 134.41, 134.60, 136.27, 136.33, 137.81, 138.69, 139.19, 139.28, 145.68, 153.44, 158.59, 160.93, 185.71 (C=O); Elemental analysis calculated for C<sub>21</sub>H<sub>13</sub>N<sub>3</sub>O<sub>2</sub> (%): C, (73.89); H, (4.43); N, (12.31); observed (%): C, (73.80); H, (4.37); N, (12.26).
